1 Polygenic adaptation and convergent evolution across  
2 both growth and cardiac genetic pathways in African  
3 and Asian rainforest hunter-gatherers

4 Christina M. Bergey<sup>1,2</sup>, Marie Lopez<sup>3,4,5</sup>, Genelle F. Harrison<sup>6</sup>, Etienne  
5 Patin<sup>3,4,5</sup>, Jacob Cohen<sup>2</sup>, Lluís Quintana-Murci<sup>3,4,5,\*</sup>, Luis B. Barreiro<sup>6,\*</sup>,  
6 and George H. Perry<sup>1,2,7,\*</sup>

7 <sup>1</sup>Department of Anthropology, Pennsylvania State University, University Park, Pennsylvania,  
8 U.S.A.

9 <sup>2</sup>Department of Biology, Pennsylvania State University, University Park, Pennsylvania, U.S.A.

10 <sup>3</sup>Unit of Human Evolutionary Genetics, Institut Pasteur, Paris, France.

11 <sup>4</sup>Centre National de la Recherche Scientifique UMR 2000, Paris, France.

12 <sup>5</sup>Center of Bioinformatics, Biostatistics and Integrative Biology, Institut Pasteur, Paris, France.

13 <sup>6</sup>Université de Montréal, Centre de Recherche CHU Sainte-Justine, Montréal, Canada.

14 <sup>7</sup>Huck Institutes of the Life Sciences, Pennsylvania State University, University Park,  
15 Pennsylvania, U.S.A.

16 \* *Co-senior authors*

17 June 14, 2018

18 Corresponding authors: C.M.B. (cxb585@psu.edu) and G.H.P. (ghp3@psu.edu)

## 19 Abstract:

20

21 Different human populations facing similar environmental challenges have  
22 sometimes evolved convergent biological adaptations, for example hypoxia re-  
23 sistance at high altitudes and depigmented skin in northern latitudes on separate  
24 continents. The pygmy phenotype (small adult body size), a characteristic of  
25 hunter-gatherer populations inhabiting both African and Asian tropical rain-  
26 forests, is often highlighted as another case of convergent adaptation in humans.  
27 However, the degree to which phenotypic convergence in this polygenic trait is  
28 due to convergent vs. population-specific genetic changes is unknown. To address  
29 this question, we analyzed high-coverage sequence data from the protein-coding  
30 portion of the genomes (exomes) of two pairs of populations, Batwa rainfor-  
31 est hunter-gatherers and neighboring Bakiga agriculturalists from Uganda, and  
32 Andamanese rainforest hunter-gatherers (Jarawa and Onge) and Brahmin agri-  
33 culturalists from India. We observed signatures of convergent positive selection  
34 between the Batwa and Andamanese rainforest hunter-gatherers across the set of  
35 genes with annotated ‘growth factor binding’ functions ( $p < 0.001$ ). Unexpect-  
36 edly, for the rainforest groups we also observed convergent and population-specific  
37 signatures of positive selection in pathways related to cardiac development (e.g.  
38 ‘cardiac muscle tissue development’;  $p = 0.001$ ). We hypothesize that the growth  
39 hormone sub-responsiveness likely underlying the pygmy phenotype may have led  
40 to compensatory changes in cardiac pathways, in which this hormone also plays  
41 an essential role. Importantly, in the agriculturalist populations we did not ob-  
42 serve similar patterns of positive selection on sets of genes associated with either  
43 growth or cardiac development, indicating that our results most likely reflect

44 a history of convergent adaptation to the similar ecology of rainforest hunter-  
45 gatherers rather than a more common or general evolutionary pattern for human  
46 populations.

## 47 **Introduction**

48 Similar ecological challenges may repeatedly result in similar evolutionary outcomes, and  
49 many instances of phenotypic convergence arising from parallel changes in the same genetic  
50 loci have been uncovered (reviewed in [1–3]). Many examples of convergent genetic evolution  
51 reported to date are for simple monogenic traits, for example depigmentation in independent  
52 populations of Mexican cave fish living in lightless habitats [4, 5] and persistence of the abil-  
53 ity to digest lactose in adulthood in both European and African agriculturalist/pastoralist  
54 humans [6]. Most biological traits, however, are highly polygenic. Since the reliable detection  
55 of positive selection in aggregate on multiple loci of individually small effect (i.e., polygenic  
56 adaptation) is relatively difficult [7–11], the extent to which convergent genetic changes at  
57 the same loci and functional pathways or changes affecting distinct genetic pathways may  
58 underlie these complex traits is less clear.

59 Human height is a classic example of a polygenic trait with approximately 800 known  
60 loci significantly associated with stature in Europeans collectively accounting for 27.4% of  
61 the heritable portion of height variation in this population [12]. A stature phenotype also  
62 represents one of most striking examples of convergent evolution in humans. Small body  
63 size (or the “pygmy” phenotype, e.g. average adult male stature <155 cm) appears to have  
64 evolved independently in rainforest hunter-gatherer populations from Africa, Asia, and South  
65 America [13], as groups on different continents do not share common ancestry to the exclusion  
66 of nearby agriculturalists [14, 15]. Positive correlations between stature and the degree of  
67 admixture with neighboring agriculturalists have confirmed that the pygmy phenotype is,

68 at least in part, genetically mediated and therefore potentially subject to natural selection  
69 [16–20].

70 Indeed, previous population genetic studies have identified signatures of strong positive  
71 natural selection across the genomes of various worldwide rainforest hunter-gatherer groups  
72 [15, 19, 21, 22]. In some cases, the candidate positive selection regions were significantly  
73 enriched for genes involved in growth processes and pathways [15, 19]. However, in one rain-  
74 forest hunter-gatherer population, the Batwa from Uganda, an admixture mapping approach  
75 was used to identify 16 genetic loci specifically associated with the pygmy phenotype [17].  
76 While these genomic regions were enriched for genes involved in the growth hormone path-  
77 way and for variants associated with stature in Europeans, there was no significant overlap  
78 between the pygmy phenotype-associated regions and the strongest signals of positive selec-  
79 tion in the Batwa genome. Rather, subtle shifts in allele frequencies were observed across  
80 these regions in aggregate, consistent with a history of polygenic adaptation for the Batwa  
81 pygmy phenotype [17] and underscoring the importance of using different types of population  
82 genetic approaches to study the evolutionary history of this trait. Similar studies focused on  
83 other rainforest hunter-gatherer groups have found enrichment for signatures of selection on  
84 genes involved in growth [15] and various growth factor signaling pathways [19], immunity  
85 [19, 21, 22], metabolism [19, 21, 22], development [15, 22], and reproduction [19, 21, 22].

86 Here, we investigate population-specific and convergent patterns of positive selection in  
87 African and Asian hunter-gatherer populations using genome-wide sequence data from two  
88 sets of populations: the Batwa rainforest hunter-gatherers of Uganda in East Africa and the  
89 nearby Bakiga agriculturalists [23], and the Jarawa and Onge rainforest hunter-gatherers of  
90 the Andaman Islands in South Asia and the Uttar Pradesh Brahmin agriculturalists from  
91 mainland India [24, 25]. We specifically test whether convergent or population-specific signa-  
92 tures of positive selection, as detected both with ‘outlier’ tests designed to identify strong sig-  
93 natures of positive selection and tests designed to identify signatures of polygenic adaptation,

94 are enriched for genes with growth-related functions. After studying patterns of convergent-  
95 and population-specific evolution in the Batwa and Andamanese hunter-gatherers, we then  
96 repeat these analyses in the paired Bakiga and Brahmin agriculturalists to evaluate whether  
97 the evolutionary patterns most likely relate to adaptation to hunter-gatherer subsistence  
98 in rainforest habitats, rather than being more generalized evolutionary patterns for human  
99 populations.

## 100 Results

101 We sequenced the protein coding portions of the genomes (exomes) of 50 Batwa rainforest  
102 hunter-gatherers and 50 Bakiga agriculturalists (dataset originally reported in [23]), identi-  
103 fied single nucleotide polymorphisms (SNPs), and analyzed the resultant data alongside those  
104 derived from published whole genome sequence data for 10 Andamanese rainforest hunter-  
105 gatherers and 10 Brahmin agriculturalists (dataset from [25]). We restricted our analysis to  
106 exonic SNPs, for comparable analysis of the Asian whole genome sequence data with the  
107 African exome sequence data. To polarize allele frequency differences observed between each  
108 pair of hunter-gatherer and agriculturalist populations, we merged these data with those from  
109 outgroup comparison populations from the 1000 Genomes Project [26]: exome sequences of  
110 30 unrelated British individuals from England and Scotland (GBR) for comparison with  
111 the Batwa/Bakiga data, and exome sequences of 30 Luhya individuals from Webuye, Kenya  
112 (LWK) for comparison with the Andamanese/Brahmin data. Outgroup populations were se-  
113 lected for genetic equidistance from the test populations. While minor levels of introgression  
114 from a population with European have been observed for the Batwa and Bakiga [23, 27],  
115 PBS is relatively robust to low levels of admixture [28].

116 To identify regions of the genome that may have been affected by positive selection in  
117 each of our test populations, we computed the population branch statistic (PBS; [29]) for

118 each exonic SNP identified among or between the Batwa and Bakiga, and Andamanese and  
119 Brahmin populations (Fig. S1, S2; Table S15). PBS is an estimate of the magnitude of allele  
120 frequency change that occurred along each population lineage following divergence of the  
121 most closely related populations, with the allele frequency information from the outgroup  
122 population used to polarize frequency changes to one or both branches. Larger PBS values  
123 for a population reflect greater allele frequency change on that branch, which in some cases  
124 could reflect a history of positive selection [29].

125 For each analyzed population, we computed a PBS selection index for each gene by  
126 comparing the mean PBS for all SNPs located within that gene to a distribution of values  
127 estimated by shuffling SNP-gene associations (without replacement) and re-computing the  
128 mean PBS value for that gene 100,000 times (Table S17). The PBS selection index is the  
129 percentage of permuted values that is higher than the actual (observed) mean PBS value  
130 for that gene. Per-gene PBS selection index values were not significantly correlated with  
131 gene size (linear regression of log adjusted selection indices against gene length: adjusted  
132  $R^2 = -2.74 \times 10^{-5}$ ,  $F$ -statistic  $p = 0.81$ ; Fig. S3), suggesting that this metric is not overtly  
133 biased by gene size.

134 Convergent evolution can operate at different scales, including on the same mutation  
135 or amino acid change, different genetic variants between populations but within the same  
136 genes, or across a set of genes involved in the same biomolecular pathway or functional  
137 annotation. Given that our motivating phenotype is a complex trait and signatures of  
138 polygenic adaptation are expected to be relatively subtle and especially difficult to detect  
139 at the individual mutation and gene levels, in this study we principally consider patterns of  
140 convergence versus population specificity at the functional pathway/annotation level. We  
141 do note that when we applied the same approaches described in this study to individual  
142 SNPs, we identified several individual alleles with patterns of convergent allele frequency  
143 evolution between the Batwa and Andamanese that may warrant further study (Table S16),

144 including a nonsynonymous SNP in the gene *FIG4*, which when disrupted in mice results  
145 in a phenotype of small but proportional body size [30]. However, likely related to the  
146 above-discussed challenges of identifying signatures of polygenic adaptation at the locus-  
147 specific level, the results of our individual SNP and gene analyses were otherwise largely  
148 unremarkable, and thus the remainder of our report and discussion focuses on pathway-level  
149 analyses.

## 150 **Outlier signatures of strong convergent and population-specific se-** 151 **lection**

152 The set of genes with the lowest (outlier) PBS index values for each population may be  
153 enriched for genes with histories of relatively strong positive natural selection. We used a  
154 permutation-based analysis to test whether curated sets of genome-wide growth-associated  
155 genes (4 lists tested separately ranging from 266-3,996 genes; 4,888 total genes; Suppl. Text)  
156 or individual Gene Ontology (GO) annotated functional categories of genes (GO categories  
157 with fewer than 50 genes were excluded) have significant convergent excesses of genes with  
158 low PBS selection index values ( $< 0.01$ ) in both of two cross-continental populations, for  
159 example the Batwa and Andamanese. Specifically, we first used Fisher's exact tests to  
160 estimate the probability that the number of genes with PBS selection index values  $< 0.01$   
161 was greater than that expected by chance, for each functional category set of genes and  
162 population. We then reshuffled the PBS selection indices across all genes 1,000 different  
163 times for each population to generate distributions of permuted enrichment p-values for  
164 each functional category set of genes. We compared our observed Batwa and Andamanese  
165 Fisher's exact test p-values to those from the randomly generated distributions as follows. We  
166 computed the joint probability of the null hypotheses for both the Andamanese and Batwa  
167 being false as  $(1 - p_{Batwa})(1 - p_{Andamanese})$ , where  $p_{Batwa}$  and  $p_{Andamanese}$  are the p-values of

168 the Fisher’s exact test, and we compared this joint probability estimate to the same statistic  
169 computed for the p-values from the random iterations. We then defined the p-value of our  
170 empirical test for convergent evolution as the probability that this statistic was more extreme  
171 (lower) for the observed values than for the randomly generated values. The resultant p-value  
172 summarizes the test of the null hypothesis that both results could have been jointly generated  
173 under random chance. While each individual population’s outlier-based test results are not  
174 significant after multiple test correction, this joint approach provides increased power to  
175 identify potential signatures of convergent selection by assessing the probability of obtaining  
176 two false positives in these independent samples.

177 Several GO biological processes were significantly overrepresented—even when account-  
178 ing for the number of tests performed—among the sets of genes with outlier signatures of  
179 positive selection in both the Batwa and Andamanese hunter-gatherer populations (empiri-  
180 cal test for convergence  $p < 0.005$ ; Table S1; Fig. 1A). These GO categories include ‘limb  
181 morphogenesis’ (GO:0035108; empirical test for convergence  $p < 0.001$ ;  $q < 0.001$ ; Batwa:  
182 genes observed = 5, expected = 1.69, Fisher’s exact  $p = 0.027$ ; Andamanese: observed = 6,  
183 expected = 2.27, Fisher’s exact  $p = 0.025$ ).

184 Other functional categories of genes were overrepresented in the sets of outlier loci for  
185 one of these hunter-gatherer populations but not the other (Fig. 1A; Table S2, S24). The  
186 top population-specific enrichments for genes with outlier PBS selection index values for  
187 the Batwa were associated with growth and development: ‘muscle organ development’  
188 (GO:0007517; observed genes: 10; expected genes: 4.02;  $p = 0.007$ ) and ‘negative regu-  
189 lation of growth’ (GO:0045926; observed = 7; expected = 2.48;  $p = 0.012$ ). Significantly  
190 overrepresented GO biological processes for the Andamanese included ‘negative regulation  
191 of cell differentiation’ (GO:0045596; observed genes: 18; expected genes: 9.79;  $p = 0.009$ ).  
192 However, these population-specific enrichments were not significant following multiple test  
193 correction (false discovery rate  $q = 0.71$  for both Batwa terms and  $q = 0.22$  for the An-



## GO categories with significant enrichment for signatures of strong positive selection

### A. Rainforest hunter-gatherers

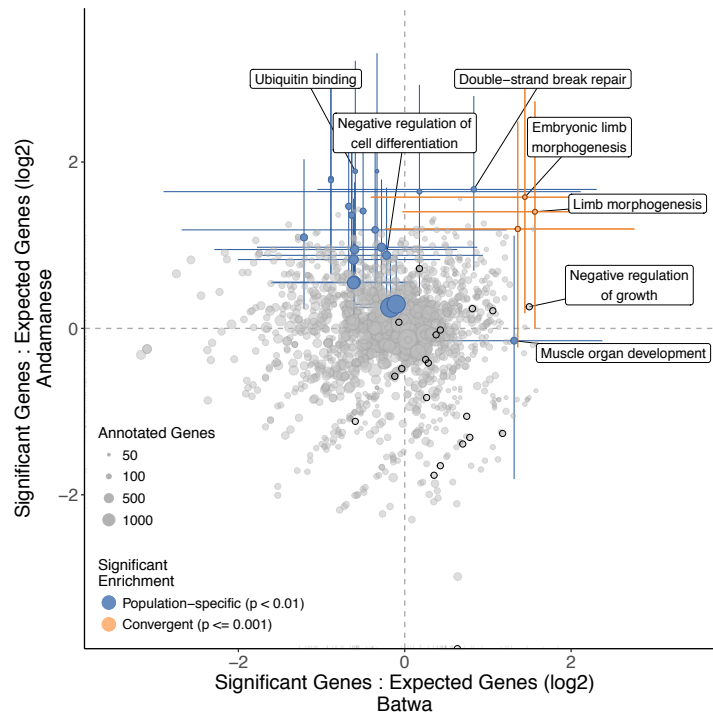

### B. Agriculturalists

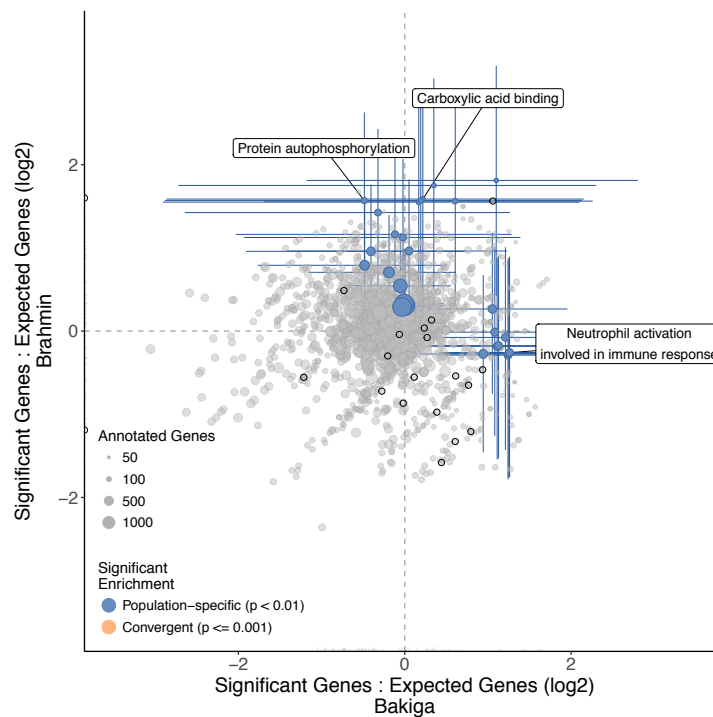

Figure 1: (Continued on the following page.)

Figure 1: Gene Ontology (GO) functional categories' ratios of expected to observed counts of outlier genes (with PBS selection index  $< 0.01$ ) in the Batwa and Andamanese rainforest hunter-gatherers (A) and Bakiga and Brahmin agriculturalist control comparison (B). Results shown for GO biological processes and molecular functions. Point size is scaled to number of annotated genes in category. Terms that are significantly overrepresented for genes under positive selection (Fisher  $p < 0.01$ ) in either population are shown in blue and for both populations convergently (empirical permutation-based  $p \leq 0.001$ ) are shown in orange. Colored lines represent 95% CI for significant categories estimated by bootstrapping genes within pathways. Dark outlines indicate growth-associated terms: the 'growth' biological process (GO:0040007) and its descendant terms, or the molecular functions 'growth factor binding,' 'growth factor receptor binding,' 'growth hormone receptor activity,' and 'growth factor activity' and their sub-categories.

194 damanese result).

195 In contrast, no GO functional categories were observed to have similarly significant con-  
196 vergent excesses of 'outlier' genes with signatures of positive selection across the two agri-  
197 culturalist populations as that observed for the rainforest hunter-gatherer populations (Fig.  
198 1B; Table S19), and the top ranked GO categories from both the convergent evolution anal-  
199 ysis and the population-specific analyses were absent any obvious connections to skeletal  
200 growth. The top-ranked functional categories with enrichments for genes with outlier PBS  
201 selection index values for the individual agriculturalist populations included 'neutrophil acti-  
202 vation involved in immune response' for the Bakiga (GO:0002283; observed = 13; expected =  
203 5.43;  $p = 0.003$ ;  $q = 0.41$ ) and 'protein autophosphorylation' for the Brahmin (GO:0046777;  
204 observed = 11; expected = 3.71;  $p = 0.0012$ ;  $q = 0.16$ ; Table S24).

## 205 **Signatures of convergent and population-specific polygenic adapta-** 206 **tion**

207 Outlier-based approaches such as that presented above are expected to have limited power  
208 to identify signatures of polygenic adaptation [7–11], which is our expectation for the pygmy  
209 phenotype [17]. Unlike the previous analyses in which we identified functional categories

210 with an enriched number of genes with outlier PBS selection index values, for our poly-  
211 genic evolution analysis we computed a “distribution shift-based” statistic to instead identify  
212 functionally-grouped sets of loci with relative shifts in their distributions of PBS selection  
213 indices. Specifically, we used the Kolmogorov-Smirnov (KS) test to quantify the distance  
214 between the distribution of PBS selection indices for the genes within a functional category  
215 to that of the genome-wide distribution. Significantly positive shifts in the PBS selection  
216 index distribution for a particular functional category may reflect individually subtle but  
217 consistent allele frequency shifts across genes within the category, which could result from  
218 either a relaxation of functional constraint or a history of polygenic adaptation. Our ap-  
219 proach is similar to another recent method that was used to detect polygenic signatures  
220 of pathogen-mediated adaptation in humans [31]. As above, we identified functional cate-  
221 gories with convergently high KS values between cross-continental groups by repeating these  
222 tests 1,000 times on permuted gene-PBS values and computing the joint probability of both  
223 null hypotheses being false for the two populations. We then compared this value from the  
224 random iterations to the same statistic computed with the observed KS p-values for each  
225 functional category. For example, for the Batwa and Andamanese, we tallied the number  
226 of random iterations for which the joint probability of both null hypotheses being false was  
227 more extreme (lower) than those of the random iterations. In this way we tested the null  
228 hypothesis that both of our observed p-values could have been jointly generated by random  
229 chance.

230 The GO molecular function with the strongest signature of a convergent polygenic shift  
231 in PBS selection indices across the Batwa and Andamanese populations was ‘growth fac-  
232 tor binding’ (Table S3; Fig. 2A; GO:0019838; Batwa  $p = 0.021$ ; Andamanese  $p = 0.027$ ;  
233 Fisher’s combined  $p = 0.0048$ ; empirical test for convergence  $p < 0.001$ ;  $q < 0.001$ ), and the  
234 top GO biological process was ‘organ growth’ (GO:0035265; Batwa  $p = 0.028$ ; Andamanese  
235  $p = 0.045$ ; Fisher’s combined  $p = 0.0095$ ; empirical test for convergence  $p = 0.001$ ;  $q = 1$ ).

236 The other top Batwa-Andamanese convergent GO biological processes are not as obviously  
237 related to growth, but instead involve muscles, particularly heart muscles. A significant  
238 convergent shift in PBS selection indices across both hunter-gatherer populations was ob-  
239 served for ‘cardiac muscle tissue development’ (GO:0048738; Batwa  $p = 0.046$ ; Andamanese  
240  $p = 0.003$ ; Fisher’s combined  $p = 0.001$ ; empirical test for convergence  $p = 0.001$ ;  $q = 1$ ).

241 In contrast, when this analysis was repeated on the agriculturalist populations, no growth-  
242 or muscle-related functional annotations were observed with significantly convergent shifts  
243 in both populations (Fig. 2B; Table S26). The GO categories with evidence of potential  
244 convergent evolution between the agriculturalists were the biological processes ‘leukocyte  
245 differentiation’ (GO:0002521; Bakiga  $p = 0.0086$ ; Brahmin  $p = 0.0149$ ; Fisher’s combined  
246  $p = 0.00128$ ; convergence empirical  $p < 0.001$ ;  $q < 0.001$ ) and ‘protein autophosphoryla-  
247 tion’ (GO:0046777; Bakiga  $p = 0.033$ ; Brahmin  $p = 0.0099$ ; Fisher’s combined  $p = 0.003$ ;  
248 convergence empirical  $p = 0.001$ ;  $q = 1$ ).

249 We also used Bayenv, a Bayesian linear modeling method for identifying loci with allele  
250 frequencies that covary with an ecological variable [9, 32], to assess the level of consistency  
251 with our convergent polygenic PBS shift results. Specifically, we used Bayenv to test whether  
252 the inclusion of a binary variable indicating subsistence strategy would increase the power  
253 to explain patterns of genetic diversity for a given functional category of loci over a model  
254 that only considered population history (as inferred from the covariance of genome-wide  
255 allele frequencies in the dataset.) We converted Bayes factors into per-gene index values via  
256 permutation of SNP-gene associations (Table S21) and identified GO terms with significant  
257 shifts in the Bayenv Bayes factor index distribution [9, 32] (Table S27). The top results from  
258 this analysis included ‘growth factor activity’ (GO:0008083;  $p = 0.006$ ;  $q = 0.11$ ), categories  
259 related to enzyme regulation (e.g. ‘enzyme regulator activity’; GO:0030234;  $p = 0.003$ ;  $q =$   
260  $0.01$ ), and categories related to muscle cell function (e.g. ‘microtubule binding’; GO:0008017;  
261  $p = 0.003$ ;  $q = 0.10$ ). There were more GO terms that were highly ranked ( $p < 0.05$ ) in both

## GO categories with significant enrichment for signatures of polygenic selection

### A. Rainforest hunter-gatherers

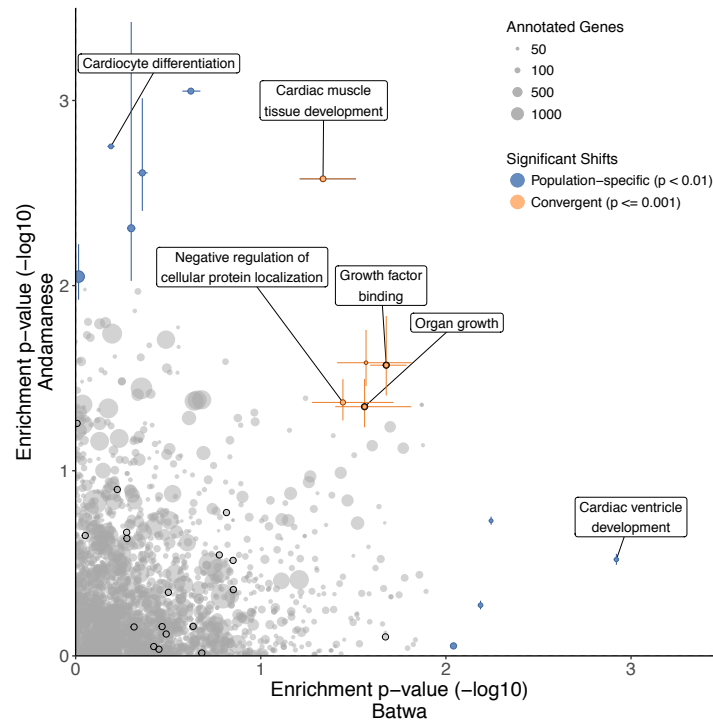

### B. Agriculturalists

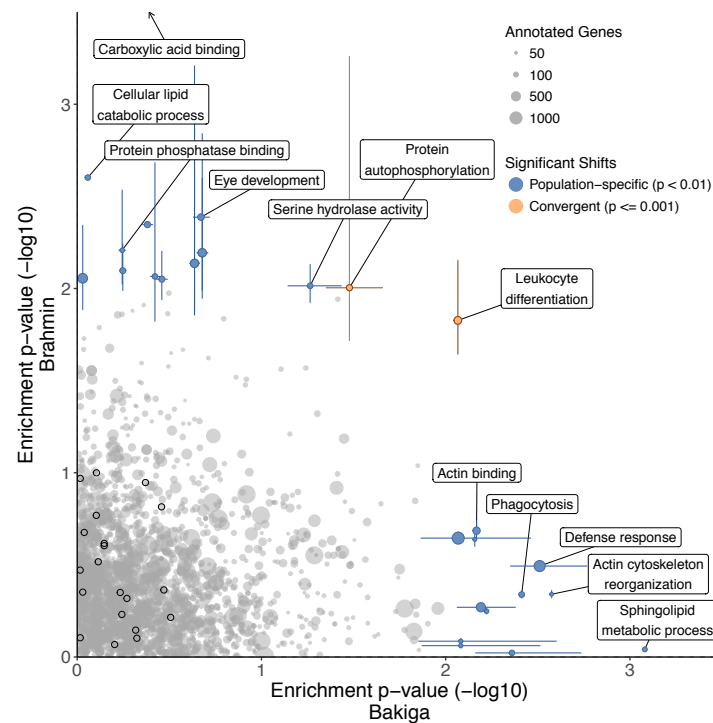

Figure 2: (Continued on the following page.)

Figure 2: Gene Ontology (GO) functional categories' distribution shift test p-values, indicating a shift in the PBS selection index values for these genes, in the Batwa and Andamanese rainforest hunter-gatherers (A) and Bakiga and Brahmin agriculturalist control comparison (B). Results shown for GO biological processes and molecular functions. Point size is scaled to number of annotated genes in category. Terms that are significantly enriched for genes under positive selection (Kolmogorov-Smirnov  $p < 0.01$ ) in either population are shown in blue and for both populations convergently (empirical permutation-based  $p \leq 0.001$ ) are shown in orange. Colored lines represent 95% CI for significant categories estimated by bootstrapping genes within pathways. Dark outlines indicate growth-associated terms: the 'growth' biological process (GO:0040007) and its descendant terms, or the molecular functions 'growth factor binding,' 'growth factor receptor binding,' 'growth hormone receptor activity,' and 'growth factor activity' and their sub-categories. One GO molecular function, "carboxylic acid binding" (GO:0031406; Brahmin  $p = 7.3 \times 10^{-5}$ ;  $q = 0.0050$ ) not shown, but indicated with arrow.

262 the hunter-gatherer PBS shift-based empirical test of convergence and the Bayenv analysis  
263 than expected by chance (for biological processes GO terms: observed categories in common  
264 = 13, expected = 8.03, Fisher's exact test  $p = 9.67 \times 10^{-5}$ ; for molecular function GO terms:  
265 observed categories in common = 4, expected = 1.45, Fisher's exact test  $p = 0.045$ ).

266 While we did not observe any significant population-specific shifts in PBS selection index  
267 values for growth-associated GO functional categories in any of our studied populations  
268 (Table S4; Suppl. Text), for each individual rainforest hunter-gatherer population we did  
269 observe nominal shifts in separate biological process categories involving the heart (Fig.  
270 2A). For the Batwa, 'cardiac ventricle development' (GO:0003231) was the top population-  
271 specific result (median PBS index = 0.272 vs. genome-wide median PBS index = 0.528;  
272  $p = 0.001$ ;  $q = 0.302$ ). For the Andamanese, 'cardiocyte differentiation' (GO:0035051) was  
273 also ranked highly (median PBS index = 0.353 vs. genome-wide median PBS index = 0.552;  
274  $p = 0.002$ ;  $q = 0.232$ ). We note that while these are separate population-specific signatures,  
275 17 genes are shared between the above two cardiac-related pathways (of 61 total 'cardiocyte  
276 differentiation' genes total, 28%; of 71 total 'cardiac ventricle development' genes, 24%; Table  
277 S28).

278 In contrast, cardiac development-related GO categories were not observed among those  
279 with highly-ranked population-specific polygenic shifts in selection index values for either  
280 the Bakiga or Brahmin agriculturalists (Fig. 2B; Table S29). The only GO term with a  
281 significant population-specific shift in the agriculturalists after multiple test correction was  
282 molecular function ‘carboxylic acid binding’ in the Brahmins (GO:0031406;  $p = 7.30 \times 10^{-5}$ ;  
283  $q = 0.005$ ).

284 To ensure that our results were robust to several possible biases, we repeated the above  
285 analyses with several modifications. First, to control for potential biases related to varia-  
286 tion in gene length and SNP minor allele frequency (MAF), we repeated all analyses after  
287 computing the PBS selection index with binning of genes by length and SNPs by MAF,  
288 respectively. Our results were not materially different (Tables S5-S12; Figs. S4-S8; Suppl.  
289 Text). Second, to account for the effect of linkage disequilibrium among SNPs within a  
290 gene, we re-computed the empirical test for convergence p-values by permuting gene-GO  
291 relationships when generating the random null distributions for the PBS selection index val-  
292 ues instead of gene-PBS relationships as in our original analysis. Again, downstream results  
293 were largely unchanged (Table S13-S14; Suppl. Text). These additional analyses increase  
294 our confidence that our results are not artifactual.

## 295 Discussion

296 The independent evolution of small adult body size in multiple different tropical rainforest  
297 environments worldwide presents a natural human model for comparative study of the ge-  
298 netic and evolutionary bases of growth and body size. Through an evolutionary genomic  
299 comparison of African and Asian rainforest hunter-gatherer populations to one another and  
300 with nearby agriculturalists, we have gained additional, indirect insight into the genetic  
301 structure of body size, a fundamental biological trait. Specifically, we identified a signa-

302 ture of potential convergent positive selection on the growth factor binding pathway that  
303 could partially underlie the independent evolution of small body size in African and Asian  
304 rainforest hunter-gatherers.

305 Unexpectedly, we also observed signatures of potential polygenic selection across func-  
306 tional categories of genes related to heart development in the rainforest hunter-gatherer  
307 populations, both convergently and on a population-specific basis. To a minor extent, the  
308 growth factor- and heart-related functional categories highlighted in our study do overlap: of  
309 the 123 total genes annotated across the three heart-related categories (‘cardiac muscle tis-  
310 sue development’ GO:0048738, ‘cardiac ventricle development’ GO:0003231, and ‘cardiocyte  
311 differentiation’ GO:0035051), nine (7.3%) are also included among the 66 annotated genes  
312 in the ‘growth factor binding’ category (GO:0019838). However, even after excluding these  
313 nine genes from our dataset, we still observed similar polygenic PBS shifts in the Batwa and  
314 Andamanese for both growth factor- and heart-related functional categories (Suppl. Text),  
315 demonstrating that our observations are not driven solely by cross-annotated genes.

316 We hypothesize that the evolution of growth hormone sub-responsiveness, which appears  
317 to at least partly underlie short stature in some rainforest hunter-gatherer populations [33–  
318 37] may in turn have also resulted in strong selection pressure for compensatory adaptations  
319 in cardiac pathways. The important roles of growth hormone (GH1) in the heart are evi-  
320 dent from studies of patients deficient in the hormone. For example, patients with growth  
321 hormone deficiency are known to be at an increased risk of atherosclerosis and mortality  
322 from cardiovascular disease [38] and have worse cardiac function [39]. More broadly, shorter  
323 people have elevated risk of coronary artery disease [40], likely due to the pleiotropic effects  
324 of variants affecting height and atherosclerosis development [41]. Such health outcomes may  
325 relate to the important roles that growth hormone plays in the development and function  
326 in the myocardium [42, 43], which contains a relatively high concentration of receptors for  
327 growth hormone [44]. We hypothesize that the adaptive evolution of growth hormone sub-



328 responsiveness underlying short stature in rainforest hunter-gatherers may have necessitated  
329 compensatory adaptations in the cardiac pathways reliant on growth hormone.

330 An alternative explanation for our finding of potential convergent positive selection on  
331 cardiac-related pathways relates to the nutritional stress of full-time human rainforest habi-  
332 tation. Especially prior to the ability to trade forest products for cultivated goods with  
333 agriculturalists, the diets of full-time rainforest hunter-gatherers may have been calorically  
334 and nutritionally restricted on at least a seasonal basis [13]. Caloric restriction has a direct  
335 functional impact on cardiac metabolism and function, with modest fasting in mice leading to  
336 the depletion of myocardial phospholipids, which potentially act as a metabolic reserve to en-  
337 sure energy to essential heart functions [45]. In human rainforest hunter-gatherers, selection  
338 may have favored variants conferring cardiac phenotypes optimized to maintain myocardial  
339 homeostasis during the nutritional stress that these populations may have experienced in  
340 the past.

341 An important caveat to our study is the lack of statistical significance for our population-  
342 specific analyses after controlling for the multiplicity of tests resulting from hierarchically  
343 nested GO terms. The absence of strong signals of positive selection that are robust to  
344 the multiple testing burden likely reflects both the expected subtlety of evolutionary sig-  
345 nals of selection on polygenic traits and the restriction of our dataset to gene coding region  
346 sequences. However, our comparative approach to identify signatures of convergent evo-  
347 lution is more robust. Therefore, while we cannot yet accurately estimate the extent to  
348 which signatures of positive selection that potentially underlie the evolution of the pygmy  
349 phenotype occurred in the same versus distinct genetic pathways between the Batwa and  
350 Andamanese, we do feel confident in our findings of convergent growth-related and cardiac-  
351 related pathways evolution. The concurrent signatures of convergent evolution across these  
352 two pathways in both African and Asian rainforest hunter-gatherers is an example of the in-  
353 sight into a biomedically-relevant phenotype that can be gained from the comparative study

354 of human populations with non-pathological natural variation.

## 355 **Materials and Methods**

### 356 **Sample collection and dataset generation**

357 Sample collection, processing, and sequencing have been previously described [17, 23]. Briefly,  
358 sampling of biomaterials (blood or saliva) from Batwa rainforest hunter-gatherers and Bakiga  
359 agriculturalists of southwestern Uganda took place in 2010 [17]. The study was approved by  
360 the Institutional Review Boards (IRBs) of both the University of Chicago (#16986A) and  
361 Makerere University, Kampala, Uganda (#2009-137), and local community approval and  
362 individual informed consent were obtained before collection. DNA samples of 50 Batwa  
363 and 50 Bakiga adults were included in the present study. Exome capture, sequencing,  
364 and variant calling were described previously [23]. Briefly, sequence reads were aligned  
365 to the hg19/GRCh37 genome with BWA v.0.7.7 mem with default settings [46], PCR dupli-  
366 cates were detected with Picard Tools v.1.94 (<http://broadinstitute.github.io/picard>), and  
367 re-alignment around indels and base quality recalibration was done with GATK v3.5 [47]  
368 using the known indel sites from the 1000 Genomes Project [26]. Variants were called indi-  
369 vidually with GATK HaplotypeCaller [47], and variants were pooled together with GATK  
370 GenotypeGVCF and filtered using VQSR. Only biallelic SNPs with a minimum depth of 5x  
371 and less than 85% missingness that were polymorphic in the entire dataset were retained for  
372 analyses.

373 Variant data for the Andamanese individuals (Jarawa and Onge) and an outgroup main-  
374 land Indian population (Uttar Pradesh Brahmins) from [25] were downloaded in VCF file  
375 format from a public website. To ensure the exome capture-derived African and whole  
376 genome shotgun sequencing-derived Asian datasets were comparable, we restricted our anal-  
377 yses of these data to exonic SNPs only.

## 378 **Merging with 1000 Genomes data**

379 We chose outgroup comparison populations from the 1000 Genomes Project [26] to be equally  
380 distantly related to the ingroup populations: Reads from a random sample of 30 unrelated  
381 individuals from British in England and Scotland (GBR) and Luhya in Webuye, Kenya  
382 (LWK) were chosen for the Batwa/Bakiga and Andamanese/Brahmin datasets, respectively.  
383 We re-called variants in each 1000 Genomes comparison population at loci that were variable  
384 in the ingroup populations using GATK UnifiedGenotyper [47]. Variants were filtered to  
385 exclude those with  $QD < 2.0$ ,  $MQ < 40.0$ ,  $FS > 60.0$ ,  $HaplotypeScore > 13.0$ ,  $MQRankSum$   
386  $< -12.5$ , or  $ReadPosRankSum < -8.0$ . We removed SNPs for which fewer than 10 of the 30  
387 individuals from the 1000 Genomes datasets had genotypes.

## 388 **Computation of the Population Branch Statistic (PBS) and the** 389 **per-gene PBS index**

390 Using these merged datasets, we computed  $F_{ST}$  between population pairs using the unbiased  
391 estimator of Weir and Cockerham [48], transformed it to a measure of population divergence  
392 [ $T = -\log(1 - F_{ST})$ ], and then calculated the Population Branch Statistic (PBS), after [29].  
393 PBS was computed on a per-SNP basis. We computed an empirical p-value for each SNP,  
394 simply the proportion of coding SNPs with PBS greater than the value for this SNP, which  
395 we adjusted for FDR.

396 SNPs were annotated with gene-based information using ANNOVAR [49] with refGene  
397 (Release 76) [50] and PolyPhen [51] data. As the Andamanese/Brahmin dataset spanned  
398 the genome and the Batwa/Bakiga exome dataset included off target intronic sequences  
399 as well as untranslated regions (UTRs), and microRNAs, we restricted our analysis to only  
400 exonic SNPs. For both the Batwa/Bakiga and Andamanese/Brahmin datasets, we computed  
401 a “PBS selection index” for each gene as follows. We compared the mean PBS for all

402 SNPs located within that gene to a distribution of values estimated by shuffling SNP-gene  
403 associations (without replacement) and re-computing the mean PBS value for that gene  
404 10,000 times. We defined the PBS selection index of the gene as the percentage of these  
405 empirical mean values that is higher than its observed mean PBS value. When identifying  
406 outlier genes, gene-based indices were adjusted for FDR.

407 In order to assess potential biases related to variation in gene length and SNP minor  
408 allele frequencies (MAF), we repeated all analyses after computing the PBS selection index  
409 with binning of genes by length or SNPs by MAF. Complete details of these methods are  
410 included in the Supplemental Text.

411 To identify SNPs with allele frequencies correlated with subsistence strategy (hunter-  
412 gatherer: Andamanese and Batwa; agriculturalists: Bakiga and Brahmin), we used Bayenv2.0  
413 [32] to assess whether the addition of a binary variable denoting subsistence strategy im-  
414 proved the Bayesian model that already took into account covariance between samples due  
415 to ancestry. As with the PBS results, we computed an index for each gene by sampling  
416 new values for each SNP from the distribution of all Bayes factors and comparing the actual  
417 average for this gene to those of the bootstrapped replicates.

## 418 **Creation of *a priori* lists of growth-related genes**

419 To test the hypothesis that genes with known influence on growth would show increased  
420 positive selection in rainforest hunter-gatherer populations, we curated *a priori* lists of  
421 growth-related genes as described fully in the Supplemental Text. Briefly, we obtained  
422 the following gene lists: i) 3,996 genes that affect growth or size in mice (MP:0005378) from  
423 the Mouse/Human Orthology with Phenotype Annotations database [52]; ii) 266 genes as-  
424 sociated with abnormal skeletal growth syndromes in the Online Mendelian Inheritance in  
425 Man (OMIM) database (<https://omim.org>), as assembled by [53]; iii) 427 genes expressed  
426 substantially more highly in the mouse growth plate, the cartilaginous region on the end of

427 long bones where bone elongation occurs, than in soft tissues [lung, kidney, heart;  $\geq 2.0$   
428 fold change; [54]]; and iv) 955 genes annotated with the Gene Ontology “growth” biologi-  
429 cal process (GO:0040007). As the GH/IGF1 pathway is a major regulator of growth and  
430 disruptions to the pathway have been implicated in the pygmy phenotype, we also collected  
431 lists of genes associated with GH1 and IGF1 respectively from the OPHID database of pro-  
432 teinprotein interaction (PPI) networks [55]. Separately, we also used a list of genes found to  
433 be associated with the pygmy phenotype in the Batwa [17].

### 434 **Statistical overrepresentation and distribution shift tests**

435 Using the PBS and Bayenv indices, we next tested for a statistical over-representation of  
436 extreme values ( $p < 0.01$ ) for the above *a priori* gene lists as well as all Gene Ontology  
437 (GO) terms using the topGO package of Bioconductor [56], gene-to-GO mapping from the  
438 org.Hs.eg.db package [57], and Fisher’s exact test in “classic” mode (i.e., without adjust-  
439 ment for GO hierarchy). We similarly performed a statistical enrichment test using the  
440 Kolmogorov-Smirnov test again in “classic” mode, which tested for a shift in the distribu-  
441 tion of the PBS or Bayenv statistic, rather than an excess of extreme values. In all cases, we  
442 pruned the GO hierarchy to exclude GO terms with fewer than 50 annotated genes to reduce  
443 the number of tests, leaving 1,742 and 1,816 GO biological processes and 266 and 285 GO  
444 molecular functions tested for the African and Asian datasets, respectively. To further reduce  
445 the number of redundant tests, we also computed the semantic similarity between GO terms  
446 to remove very similar terms. We computed the similarity metric of [58] as implemented  
447 in the GoSemSim R package [59], a measure of the overlapping information content in each  
448 term using the annotation statistics of their common ancestor terms, and then clustered  
449 based on these pairwise distances between GO terms using Ward Hierarchical Clustering.  
450 We then pruned GO terms by cutting the tree at a height of 0.5 and retaining the term in  
451 each cluster with the lowest p-value. With this reduced set of GO overrepresentation and

452 distribution shift results, we adjusted the p-value for FDR.

## 453 **Identification of signatures of convergent evolution**

454 We used two methods to identify convergent evolution: i.) computation of simple com-  
455 bined p-values for SNPs, genes, and GO overrepresentation and distribution shift tests using  
456 Fisher’s and Edgington’s methods, and ii.) a permutation based approach to identify GO  
457 pathways for which both the Batwa and Andamanese overrepresentation or distribution  
458 shift test results are more extreme than is to be expected by chance (the “empirical test for  
459 convergence”). These two approaches are summarized below.

460 We searched for convergence between Batwa and Andamanese individuals by computing  
461 the joint p-value for PBS on a per-SNP, per-gene, and per-GO term basis. We calculated all  
462 joint p-values using Fisher’s method (as the sum of the natural logarithms of the uncorrected  
463 p-values for the Batwa and Andamanese tests [60]) as well as via Edgington’s method (based  
464 on the sum of all p-values [61]). Meta-analysis of p-values was done via custom script and  
465 the metap R package [62].

466 We also assessed the probability of getting two false positives in the Batwa and An-  
467 damanese selection results by shuffling the genes’ PBS indices 1,000 times and performing  
468 GO overrepresentation and distribution shift tests on these permuted values. We compared  
469 the observed Batwa and Andamanese p-values to this generated distribution of p-values, as  
470 described above. We computed the joint probability of both null hypotheses being false for  
471 the Andamanese and Batwa as  $(1 - p_{Batwa})(1 - p_{Andamanese})$ , where  $p_{Batwa}$  and  $p_{Andamanese}$  are  
472 the p-values of the Fisher’s exact test or of the Kolmogorov-Smirnov test for the outlier- and  
473 shift-based tests, respectively, and we compared the joint probability to the same statistic  
474 computed for the p-values from the random iterations. The empirical test for convergence  
475 p-value was simply the number of iterations for which this statistic was more extreme (lower)  
476 for the observed values than for the randomly generated values.

477 We also performed a variation of this analysis, but to preserve patterns of linkage disequi-  
478 librium among SNPs within a gene in the null distribution, instead of permuting gene-PBS  
479 relationships to generate the random null distributions for the PBS selection index values  
480 of the two populations considered jointly, we instead permuted the gene-GO relationships.  
481 That is, to compute the PBS selection index, the one-to-many relationships between genes  
482 and GO terms were shuffled when generating the null distribution, maintaining the groupings  
483 of GO terms that were assigned together to an original gene. Full details of this analysis are  
484 available in the Supplemental Text.

## 485 **Script and data availability**

486 All scripts used in the analysis are available at [https://github.com/bergeycm/rhg-convergence-](https://github.com/bergeycm/rhg-convergence-analysis)  
487 [analysis](https://github.com/bergeycm/rhg-convergence-analysis) and released under the GNU General Public License v3. Exome data for the Batwa  
488 and Bakiga populations have previously been deposited in the European Genome-phenome  
489 Archive under accession code EGAS00001002457. Extended data tables are available at  
490 <https://doi.org/10.18113/S1N63M>.

## 491 **References**

- 492 [1] Stern, D. L. The genetic causes of convergent evolution. *Nature Reviews Genetics* **14**,  
493 751–764 (2013).
- 494 [2] Elmer, K. R. & Meyer, A. Adaptation in the age of ecological genomics: Insights from  
495 parallelism and convergence. *Trends in Ecology and Evolution* **26**, 298–306 (2011).
- 496 [3] Christin, P. A., Weinreich, D. M. & Besnard, G. Causes and evolutionary significance  
497 of genetic convergence. *Trends in Genetics* **26**, 400–405 (2010).

- 498 [4] Protas, M. E. *et al.* Genetic analysis of cavefish reveals molecular convergence in the  
499 evolution of albinism. *Nature Genetics* **38**, 107–111 (2006).
- 500 [5] Gross, J. B., Borowsky, R. & Tabin, C. J. A novel role for Mc1r in the parallel evolution  
501 of depigmentation in independent populations of the cavefish *Astyanax mexicanus*. *PLoS*  
502 *Genetics* **5** (2009).
- 503 [6] Tishkoff, S. A. *et al.* Convergent adaptation of human lactase persistence in Africa and  
504 Europe. *Nature Genetics* **39**, 31–40 (2007).
- 505 [7] Pritchard, J. K. & Di Rienzo, A. Adaptation - not by sweeps alone. *Nature Reviews*  
506 *Genetics* **11**, 665–667 (2010).
- 507 [8] Pritchard, J. K., Pickrell, J. K. & Coop, G. The genetics of human adaptation: Hard  
508 sweeps, soft sweeps, and polygenic adaptation. *Current Biology* **20**, R208–R215 (2010).
- 509 [9] Coop, G., Witonsky, D., Di Rienzo, A. & Pritchard, J. K. Using environmental corre-  
510 lations to identify loci underlying local adaptation. *Genetics* **185**, 1411–1423 (2010).
- 511 [10] Stephan, W. Signatures of positive selection: From selective sweeps at individual loci  
512 to subtle allele frequency changes in polygenic adaptation. *Molecular Ecology* **25**, 79–88  
513 (2016).
- 514 [11] Wellenreuther, M. & Hansson, B. Detecting polygenic evolution: Problems, pitfalls,  
515 and promises. *Trends in Genetics* **32**, 155–164 (2016).
- 516 [12] Marouli, E. *et al.* Rare and low-frequency coding variants alter human adult height.  
517 *Nature* **542**, 186–190 (2017).
- 518 [13] Perry, G. H. & Dominy, N. J. Evolution of the human pygmy phenotype. *Trends in*  
519 *Ecology and Evolution* **24**, 218–225 (2009).



- 520 [14] Rasmussen, M., Guo, X. & Wang, Y. An Aboriginal Australian genome reveals separate  
521 human dispersals into Asia. *Science* **334**, 94–98 (2011).
- 522 [15] Migliano, A. B. *et al.* Evolution of the pygmy phenotype: Evidence of positive selection  
523 from genome-wide scans in African, Asian, and Melanesian pygmies. *Human Biology*  
524 **85**, 251–284 (2013).
- 525 [16] Perry, G. H. & Verdu, P. Genomic perspectives on the history and evolutionary ecology  
526 of tropical rainforest occupation by humans. *Quaternary International* **448**, 150–157  
527 (2016).
- 528 [17] Perry, G. H. *et al.* Adaptive, convergent origins of the pygmy phenotype in African rain-  
529 forest hunter-gatherers. *Proceedings of the National Academy of Sciences* **111**, E3596–  
530 E3603 (2014).
- 531 [18] Becker, N. S. A. *et al.* Indirect evidence for the genetic determination of short stature  
532 in African pygmies. *American Journal of Physical Anthropology* **145**, 390–401 (2011).
- 533 [19] Jarvis, J. P. *et al.* Patterns of ancestry, signatures of natural selection, and genetic  
534 association with stature in Western African pygmies. *PLoS Genetics* **8**, e1002641 (2012).
- 535 [20] Pemberton, T. J., Verdu, P., Becker, N. S., Willer, C. J. & Hewlett, B. S. A genome  
536 scan for genes underlying adult body size differences between Central African pygmies  
537 and their non-pygmy neighbors. *bioRxiv* 1–35 (2017).
- 538 [21] Lachance, J. *et al.* Evolutionary history and adaptation from high-coverage whole-  
539 genome sequences of diverse African hunter-gatherers. *Cell* **150**, 457–469 (2012).
- 540 [22] Hsieh, P. *et al.* Whole genome sequence analyses of Western Central African Pygmy  
541 hunter-gatherers reveal a complex demographic history and identify candidate genes  
542 under positive natural selection. *Genome Research* **26**, 279–290 (2015).

- 543 [23] Lopez, M. *et al.* The demographic history and mutational load of African hunter-  
544 gatherers and farmers. *Nature Ecology & Evolution* **2**, 721–730 (2018).
- 545 [24] Mondal, M. *et al.* Genomic analysis of Andamanese provides insights into ancient human  
546 migration into Asia and adaptation. *Nature Genetics* **48**, 1066–1070 (2016).
- 547 [25] Mondal, M., Casals, F., Majumder, P. P. & Bertranpetit, J. Further confirmation for  
548 unknown archaic ancestry in Andaman and South Asia. *bioRxiv* (2016).
- 549 [26] Auton, A. *et al.* A global reference for human genetic variation. *Nature* **526**, 68–74  
550 (2015).
- 551 [27] Patin, E. *et al.* The impact of agricultural emergence on the genetic history of African  
552 rainforest hunter-gatherers and agriculturalists. *Nature Communications* **5**, 3163 (2014).
- 553 [28] Huerta-Sánchez, E. *et al.* Genetic signatures reveal high-altitude adaptation in a set of  
554 Ethiopian populations. *Molecular Biology and Evolution* **30**, 1877–1888 (2013).
- 555 [29] Yi, X. *et al.* Sequencing of 50 human exomes reveals adaptation to high altitude. *Science*  
556 **329**, 75–78 (2010).
- 557 [30] Campeau, P. M. *et al.* Yunis-Varón syndrome is caused by mutations in FIG4, encoding  
558 a phosphoinositide phosphatase. *American Journal of Human Genetics* **92**, 781–791  
559 (2013).
- 560 [31] Daub, J. T. *et al.* Evidence for polygenic adaptation to pathogens in the human genome.  
561 *Molecular Biology and Evolution* **30**, 1544–1558 (2013).
- 562 [32] Günther, T. & Coop, G. Robust identification of local adaptation from allele frequencies.  
563 *Genetics* **195**, 205–220 (2013).

- 564 [33] Rimoin, D. L., Merimee, T. J., Rabinowitz, D., Cavalli-Sforza, L. L. & McKusick, V. A.  
565 Peripheral subresponsiveness to human growth hormone in the African pygmies. *The*  
566 *New England Journal of Medicine* **281**, 1383–1388 (1969).
- 567 [34] Merimee, T. J., Rimoin, D. L., Cavalli-Sforza, L. C., Rabinowitz, D. & McKusick, V. A.  
568 Metabolic effects of human growth hormone in the African pygmy. *The Lancet* **292**,  
569 194–195 (1968).
- 570 [35] Merimee, T. J., Rimoin, D. L. & Cavalli-Sforza, L. L. Metabolic studies in the African  
571 pygmy. *The Journal of Clinical Investigation* **51**, 395–401 (1972).
- 572 [36] Geffner, M. E., Bailey, R. C., Bersch, N., Vera, J. C. & Golde, D. W. Insulin-like growth  
573 factor-I unresponsiveness in an Efe Pygmy. *Biochemical and Biophysical Research Com-*  
574 *munications* **193**, 1216–1223 (1993).
- 575 [37] Geffner, M. E., Bersch, N., Bailey, R. C. & Golde, D. W. Insulin-like growth factor I  
576 resistance in immortalized T cell lines from African Efe Pygmies. *Journal of Clinical*  
577 *Endocrinology and Metabolism* **80**, 3732–3738 (1995).
- 578 [38] Carroll, P. V. *et al.* Growth hormone deficiency in adulthood and the effects of growth  
579 hormone replacement: A Review. *The Journal of Clinical Endocrinology & Metabolism*  
580 **83**, 382–395 (1998).
- 581 [39] Arcopinto, M. *et al.* Growth hormone deficiency is associated with worse cardiac func-  
582 tion, physical performance, and outcome in chronic heart failure: Insights from the  
583 T.O.S.CA. GHD study. *PLoS ONE* **12**, e0170058 (2017).
- 584 [40] Paajanen, T. A., Oksala, N. K., Kuukasjärvi, P. & Karhunen, P. J. Short stature is  
585 associated with coronary heart disease: A systematic review of the literature and a  
586 meta-analysis. *European Heart Journal* **31**, 1802–1809 (2010).

- 587 [41] Nelson, C. P. *et al.* Genetically determined height and coronary artery disease. *New*  
588 *England Journal of Medicine* **372**, 1608–1618 (2015).
- 589 [42] Devesa, J., Almengló, C. & Devesa, P. Multiple effects of growth hormone in the body:  
590 Is it really the hormone for growth? *Clinical Medicine Insights: Endocrinology and*  
591 *Diabetes* **9**, 47–71 (2016).
- 592 [43] Meyers, D. E. & Cuneo, R. C. Controversies regarding the effects of growth hormone  
593 on the heart. *Mayo Clinic Proceedings* **78**, 1521–1526 (2003).
- 594 [44] Mathews, L. S., Enberg, B. & Norstedt, G. Regulation of rat growth hormone receptor  
595 gene expression. *The Journal of Biological Chemistry* **264**, 9905–9910 (1989).
- 596 [45] Han, X., Cheng, H., Mancuso, D. J. & Gross, R. W. Caloric restriction results in phos-  
597 pholipid depletion, membrane remodeling, and triacylglycerol accumulation in murine  
598 myocardium. *Biochemistry* **43**, 15584–15594 (2004).
- 599 [46] Li, H. & Durbin, R. Fast and accurate short read alignment with Burrows-Wheeler  
600 transform. *Bioinformatics* **25**, 1754–1760 (2009).
- 601 [47] DePristo, M. A. *et al.* A framework for variation discovery and genotyping using next-  
602 generation DNA sequencing data. *Nature Genetics* **43**, 491–498 (2011).
- 603 [48] Weir, B. & Cockerham, C. Estimating F-statistics for the analysis of population struc-  
604 ture. *Evolution* **38**, 1358–1370 (1984).
- 605 [49] Wang, K., Li, M. & Hakonarson, H. ANNOVAR: functional annotation of genetic  
606 variants from high-throughput sequencing data. *Nucleic Acids Research* **38**, e164 (2010).
- 607 [50] O’Leary, N. A. *et al.* Reference sequence (RefSeq) database at NCBI: Current status,  
608 taxonomic expansion, and functional annotation. *Nucleic Acids Research* **44**, D733–  
609 D745 (2016).

- 610 [51] Adzhubei, I. A. *et al.* A method and server for predicting damaging missense mutations.  
611 *Nature Methods* **7**, 248–249 (2010).
- 612 [52] Blake, J. A. *et al.* Mouse Genome Database (MGD)-2017: Community knowledge  
613 resource for the laboratory mouse. *Nucleic Acids Research* **45**, D723–D729 (2017).
- 614 [53] Wood, A. R. *et al.* Defining the role of common variation in the genomic and biological  
615 architecture of adult human height. *Nature Genetics* **46**, 1173–1186 (2014).
- 616 [54] Lui, J. C. *et al.* Synthesizing genome-wide association studies and expression microarray  
617 reveals novel genes that act in the human growth plate to modulate height. *Human*  
618 *Molecular Genetics* **21**, 5193–5201 (2012).
- 619 [55] Brown, K. R. & Jurisica, I. Online predicted human interaction database. *Bioinfor-*  
620 *matics* **21**, 2076–2082 (2005).
- 621 [56] Alexa, A. & Rahnenfuhrer, J. topGO: enrichment analysis for gene ontology. *R package*  
622 *version 2* (2016).
- 623 [57] Carlson, M. *org.Hs.eg.db: Genome wide annotation for Human* (2017).
- 624 [58] Jiang, J. J. & Conrath, D. W. Semantic Similarity Based on Corpus Statistics and  
625 Lexical Taxonomy. *Proceedings of International Conference Research on Computational*  
626 *Linguistics (ROCLING X)* (1997).
- 627 [59] Yu, G. *et al.* GOSemSim: An R package for measuring semantic similarity among GO  
628 terms and gene products. *Bioinformatics* **26**, 976–978 (2010).
- 629 [60] Mosteller, F. & Fisher, R. Questions and answers. *The American Statistician* **2**, 30–31  
630 (1948).

- 631 [61] Edgington, E. S. An additive method for combining probability values from independent  
632 experiments. *The Journal of Psychology* **80**, 351–363 (1972).
- 633 [62] Dewey, M. *metap: meta-analysis of significance values* (2017).

## 634 **Acknowledgments**

635 The authors would like to thank the Batwa and Bakiga communities and all individuals  
636 who participated in this study, and J.A. Hodgson and E.C. Reeves for helpful discussions.  
637 This work was supported by NIH R01-GM115656 (to G.H.P and L.B.B.), 1 F32 GM125228-  
638 01A1 (to C.M.B), and ANR AGRHUM ANR-14-CE02-0003-01 (to L.Q.-M.). M.L. was  
639 supported by the Fondation pour la Recherche Médicale (FDT20170436932). This research  
640 was conducted with Advanced CyberInfrastructure computational resources provided by The  
641 Institute for CyberScience at The Pennsylvania State University.

## 642 **Competing interests statement**

643 The authors declare no competing interests.

1 Supplemental Material for: Polygenic adaptation and  
2 convergent evolution across both growth and cardiac  
3 genetic pathways in African and Asian rainforest  
4 hunter-gatherers

5 Christina M. Bergey<sup>1,2</sup>, Marie Lopez<sup>3,4,5</sup>, Genelle F. Harrison<sup>6</sup>, Etienne  
6 Patin<sup>3,4,5</sup>, Jacob Cohen<sup>2</sup>, Lluís Quintana-Murci<sup>3,4,5,\*</sup>, Luis B. Barreiro<sup>6,\*</sup>,  
7 and George H. Perry<sup>1,2,7,\*</sup>

8 <sup>1</sup>Department of Anthropology, Pennsylvania State University, Pennsylvania, U.S.A.

9 <sup>2</sup>Department of Biology, Pennsylvania State University, Pennsylvania, U.S.A.

10 <sup>3</sup>Unit of Human Evolutionary Genetics, Institut Pasteur, Paris, France.

11 <sup>4</sup>Centre National de la Recherche Scientifique UMR 2000, Paris, France.

12 <sup>5</sup>Center of Bioinformatics, Biostatistics and Integrative Biology, Institut Pasteur, Paris, France.

13 <sup>6</sup>Université de Montréal, Centre de Recherche CHU Sainte-Justine, H3T 1C5 Montréal, Canada.

14 <sup>7</sup>Huck Institutes of the Life Sciences, Pennsylvania State University, Pennsylvania, U.S.A.

15 \* *Co-senior authors*

16 June 14, 2018

17 Corresponding authors: C.M.B. (cxb585@psu.edu) and G.H.P. (ghp3@psu.edu)

## 18 Contents

|    |                            |           |
|----|----------------------------|-----------|
| 19 | <b>1 Supplemental Text</b> | <b>4</b>  |
| 20 | <b>2 Figures</b>           | <b>9</b>  |
| 21 | <b>3 Tables</b>            | <b>21</b> |

## 22 List of Figures

|    |    |                                                                                    |    |
|----|----|------------------------------------------------------------------------------------|----|
| 23 | S1 | Population Branch Statistic (PBS) schematic . . . . .                              | 9  |
| 24 | S2 | Population Branch Statistic (PBS) by SNP . . . . .                                 | 10 |
| 25 | S3 | Box plots of Population Branch Statistic (PBS) by gene SNP count . . . . .         | 11 |
| 26 | S4 | Plots of corrected vs. original PBS selection index values . . . . .               | 12 |
| 27 | S5 | Results of tests of enrichment for strong positive selection after gene size-based |    |
| 28 |    | correction . . . . .                                                               | 13 |
| 29 | S6 | Results of tests of enrichment for strong positive selection after MAF-based       |    |
| 30 |    | correction . . . . .                                                               | 15 |
| 31 | S7 | Results of selection index distribution shift-based tests after gene size-based    |    |
| 32 |    | correction . . . . .                                                               | 17 |
| 33 | S8 | Results of selection index distribution shift-based tests after MAF-based cor-     |    |
| 34 |    | rection . . . . .                                                                  | 19 |

## 35 List of Tables

|    |    |                                                                                 |    |
|----|----|---------------------------------------------------------------------------------|----|
| 36 | S1 | GO categories with convergent enrichment for strong positive selection . . .    | 21 |
| 37 | S2 | GO categories with population-specific enrichment for strong positive selection |    |
| 38 |    | in the hunter-gatherer populations . . . . .                                    | 22 |



|    |     |                                                                                   |    |
|----|-----|-----------------------------------------------------------------------------------|----|
| 39 | S3  | GO categories with convergent distribution shifts in PBS selection index values   |    |
| 40 |     | in the hunter-gatherer populations . . . . .                                      | 23 |
| 41 | S4  | GO categories with population-specific distribution shifts in PBS selection       |    |
| 42 |     | index values in the hunter-gatherer populations . . . . .                         | 24 |
| 43 | S5  | After gene size-based correction, GO categories with convergent enrichment        |    |
| 44 |     | for strong positive selection in the hunter-gatherer populations . . . . .        | 25 |
| 45 | S6  | After MAF-based correction, GO categories with convergent enrichment for          |    |
| 46 |     | strong positive selection in the hunter-gatherer populations . . . . .            | 26 |
| 47 | S7  | After gene size-based correction, GO categories with population-specific en-      |    |
| 48 |     | richment for strong positive selection in the hunter-gatherer populations . . .   | 27 |
| 49 | S8  | After MAF-based correction, GO categories with population-specific enrich-        |    |
| 50 |     | ment for strong positive selection in the hunter-gatherer populations . . . . .   | 28 |
| 51 | S9  | After gene size-based correction, GO categories with convergent distribution      |    |
| 52 |     | shifts in PBS selection index values in the hunter-gatherer populations . . .     | 29 |
| 53 | S10 | After MAF-based correction, GO categories with convergent distribution shifts     |    |
| 54 |     | in PBS selection index values in the hunter-gatherer populations . . . . .        | 30 |
| 55 | S11 | After gene size-based correction, GO categories with population-specific dis-     |    |
| 56 |     | tribution shifts in PBS selection index values in the hunter-gatherer populations | 31 |
| 57 | S12 | After MAF-based correction, GO categories with population-specific distribu-      |    |
| 58 |     | tion shifts in PBS selection index values in the hunter-gatherer populations .    | 32 |
| 59 | S13 | Comparison of two methods for empirical test for convergence in strong outlier    |    |
| 60 |     | selection in the hunter-gatherer populations . . . . .                            | 33 |
| 61 | S14 | Comparison of two methods for empirical test for convergence in PBS selection     |    |
| 62 |     | index shift in the hunter-gatherer populations . . . . .                          | 34 |

## 63 1 Supplemental Text

64 **Positive selection signatures on growth-associated genes** We examined whether  
65 gene-specific signatures of strong positive selection (using an “outlier-based” designation  
66 of genes with PBS index values  $< 0.01$ ) in the rainforest populations were enriched for  
67 known functional associations with growth using *a priori* lists of 4,888 total growth-related  
68 genes, consisting of (with some redundancy among individual categories, as expected): i)  
69 3,996 genes that affect growth or size in mice (MP:0005378) from the Mouse/Human Or-  
70 thology with Phenotype Annotations database [1]; ii) 266 genes associated with abnormal  
71 skeletal growth syndromes in the Online Mendelian Inheritance in Man (OMIM) database  
72 (<https://omim.org/>), as assembled by [2]; iii) 427 genes expressed substantially more highly  
73 in the mouse growth plate, the cartilaginous region on the end of long bones where bone  
74 elongation occurs, than in soft tissues (lung, kidney, heart;  $\geq 2.0$  fold change; [3]; and  
75 iv) 955 genes annotated with the Gene Ontology “growth” biological process (GO:0040007).  
76 Separately, we also considered in our analyses the set of 166 genes located within the 16  
77 genomic regions previously associated with the pygmy phenotype in the Batwa, using an  
78 admixture mapping approach [4], as well as GH1- and IGF1-associated genes using data  
79 from OPHID database of proteinprotein interaction (PPI) networks [5].

80 We used each of the curated *a priori* growth-related gene lists for testing the hypothe-  
81 sis that such loci are enriched for genes with signatures of strong positive selection (outlier  
82 PBS selection index values) or have a shift in the distribution of PBS selection index val-  
83 ues consistent with subtle polygenic adaptation in the Batwa and Andamanese rainforest  
84 hunter-gatherer but not the Bakiga and Brahmin agriculturalist populations. We identi-  
85 fied 202, 188, 291, and 252 outlier strong selection candidate genes (with PBS index values  
86  $< 0.01$ ) in each of the Batwa, Bakiga, Andamanese, and Brahmin populations, respectively.  
87 Genes in the *a priori* growth-related gene lists were not significantly overrepresented among

88 PBS outliers in any populations, except for those associated with mouse growth phenotype  
89 in the Brahmin (68 observed, 47.7 expected; Fisher  $p = 0.0179$ ) (Table S23). Though the  
90 lack of over-representation of growth-related gene lists among loci with outlier signatures of  
91 strong positive natural selection related to growth is perhaps unsurprising considering the  
92 polygenic phenotype, our distribution shift-based test also showed no significant shifts in  
93 the distribution of PBS indices for any population (Table S25). Genes in genomic regions  
94 previously associated with the pygmy phenotype in the Batwa [4] were enriched for genes  
95 with outlier PBS selection index values in the Batwa (outlier-based test: 5 observed, 1.39 ex-  
96 pected; Fisher  $p = 0.017$ ; Table S23) and the PBS distribution for the phenotype-associated  
97 genes was shifted relative to the genome-wide distribution (distribution shift-based test:  
98 Kolmogorov-Smirnov test  $p = 0.056$ ; Table S25). We found no evidence that genes associ-  
99 ated with GH1 and IGF1 were enriched for outlier or polygenic selection.

100 **Impact of cross-annotated genes between growth factor- and cardiac-related**  
101 **pathways** To assess whether shared genes in GO categories relating to the heart and  
102 growth factor binding were responsible for the significant shift in PBS selection index values  
103 for genes in these annotations, we compared the distributions of PBS selection indices before  
104 and after removing 9 genes common to heart pathways and growth factor binding. The  
105 heart GO terms assessed were: ‘cardiocyte differentiation’ (GO:0035051), with a shift in the  
106 Andamanese hunter-gatherers; ‘cardiac ventricle development’ (GO:0003231), with a shift in  
107 the Batwa hunter-gatherers; and ‘cardiac muscle tissue development’ (GO:0048738) with a  
108 convergent shift in the Batwa and Andamanese. Of the 123 heart related genes contained in  
109 these pathways, 9 were also annotated to the GO molecular function ‘growth factor binding’  
110 (GO:0019838): *ACVR1*, *EGFR*, *ENG*, *FGFR2*, *FGFRL1*, *LTBP1*, *SCN5A*, *TGFBR1*, and  
111 *TGFBR3*.

112 After removing the 9 shared genes, the mean PBS selection index for the Andamanese

113 among genes annotated to ‘cardiocyte differentiation’ decreased slightly from 0.444 to 0.443  
114 and the pre- and post-filtration distributions were not significantly different (Kolmogorov-  
115 Smirnov  $D = 0.023$ ,  $p = 1$ ). Similarly, the mean PBS selection index for the Batwa for  
116 genes in ‘cardiac ventricle development’ decreased slightly from 0.654 to 0.652, and the  
117 distributions were not significantly different ( $D = 0.044$ ,  $p = 1$ ). Finally, for ‘cardiac muscle  
118 tissue development’, the mean PBS selection index for the Andamanese increased from 0.450  
119 to 0.453, and for the Batwa increased from 0.474 to 0.486. Again the pre- and post-filtering  
120 distributions were not significantly different for the Andamanese ( $D = 0.015$ ,  $p = 1$ ) or  
121 Batwa ( $D = 0.015$ ,  $p = 1$ ).

122 Similarly, after removing 9 shared genes, the mean PBS selection index for genes anno-  
123 tated to ‘growth factor binding’ (GO:0019838) for the Batwa increased slightly from 0.437  
124 to 0.440 and for the Andamanese decreased from 0.455 to 0.437. Again, the pairs of distri-  
125 butions were not significantly different (Batwa:  $D = 0.030$ ,  $p = 1$ ; Andamanese:  $D = 0.036$ ,  
126  $p = 1$ ).

127 **Correcting for potential bias from differing gene size or global minor allele fre-**  
128 **quency (MAF)** In order to assess the potential biases related to differences in gene length  
129 (e.g. number of SNPs) or in SNP global minor allele frequencies (MAF), we repeated the  
130 analysis after modifying how the PBS selection index was computed. As in the uncorrected  
131 analysis, these corrected PBS selection index values were computed using 1,000 iterations.

132 First, to control for gene size, we sampled the PBS values for each SNP from only genes  
133 with the same number of SNPs during the computation of the selection index. For larger  
134 genes, gene sizes were binned to ensure sufficient SNPs from which to sample, using sets  
135  $[11, 15]$ ,  $[16, 20]$ , and  $[21, \infty)$ .

136 Second, to control for differing MAF values for SNPs, we did the permutation-based  
137 computation of the PBS selection index while matching SNPs on global MAF (computed

138 using the African or Asian datasets for within-continent analyses.) SNPs were grouped by  
139 MAF into bins of size 0.01, and for each SNP in a gene, SNPs were sampled from only the  
140 set in the MAF bin.

141 Neither modification to the PBS selection index computation algorithm majorly affected  
142 the PBS selection index values nor the GO-based downstream analyses. Corrected and  
143 uncorrected PBS selection index values were highly correlated ( $R^2 = 0.993$  to  $0.997$  and  
144  $0.953$  to  $0.985$  for the gene size- and MAF-corrections respectively; Fig. S4).

145 The GO biological processes and molecular functions with the strongest evidence of  
146 enrichment for strong selection were similar for the convergent (Tables S5 and S6; Figs.  
147 S5 and S6) and population-specific selection analyses (Tables S7 and S8; Figs. S5 and S6).  
148 The only mentioned growth- or heart-associated pathway that was no longer significant after  
149 correction was the biological process “negative regulation of growth,” which was significantly  
150 enriched for genes with evidence of strong selection in the Batwa in the original analysis,  
151 but its p-value rose to 0.0448 after correction for gene size. In contrast, “cardiac muscle  
152 tissue development” (GO:0048738) which originally had a convergent empirical p-value of  
153 0.025, was significantly enriched for strong positive selection convergently in the Batwa and  
154 Andamanese after MAF-based filtration ( $p = 0.001$ ).

155 Similarly, the top GO categories with evidence of polygenic selection were largely un-  
156 changed for the convergent (Tables S9 and S10; Figs. S7 and S8) and population-specific  
157 selection analyses (Tables S11 and S12; Figs. S7 and S8). Minor changes include “growth  
158 factor binding” (GO:0019838) which rose to be no longer significant with the MAF-based  
159 correction (original convergent empirical  $p < 0.001$ ; MAF corrected  $p = 0.005$ ).

160 **Modification of significance testing in empirical test for convergent evolution** We  
161 also modified and repeated the analysis that computes the significance of the convergence  
162 GO tests using a permutation-based approach. Whereas we originally permuted gene-PBS  
163 relationships to generate the random null distributions of PBS selection index values for two  
164 populations considered jointly, we instead permuted the gene-GO relationships to preserve  
165 LD patterns. The one-to-many relationships between genes and GO terms were shuffled,  
166 maintaining the groupings of GO terms that were assigned together to an original gene. We  
167 repeated the GO-based analyses for enrichment of strong selection or polygenic selection  
168 1,000 times with these randomized gene-GO annotations, and compared our actual observed  
169 values to this randomly-generated null distribution. As before, we then defined the p-value  
170 of our empirical test for convergent evolution as the probability that this statistic was more  
171 extreme (lower) for the observed values than for the randomly generated values. The resul-  
172 tant p-value summarizes the test of the null hypothesis that both results could have been  
173 jointly generated under random chance. The results of the modified test were only slightly  
174 different than the original for both convergence in strong outlier selection (Table S13) and  
175 in a shifted PBS selection index (Table S14).

176 **2 Figures**

**Fig. S1: Population Branch Statistic (PBS) schematic.**

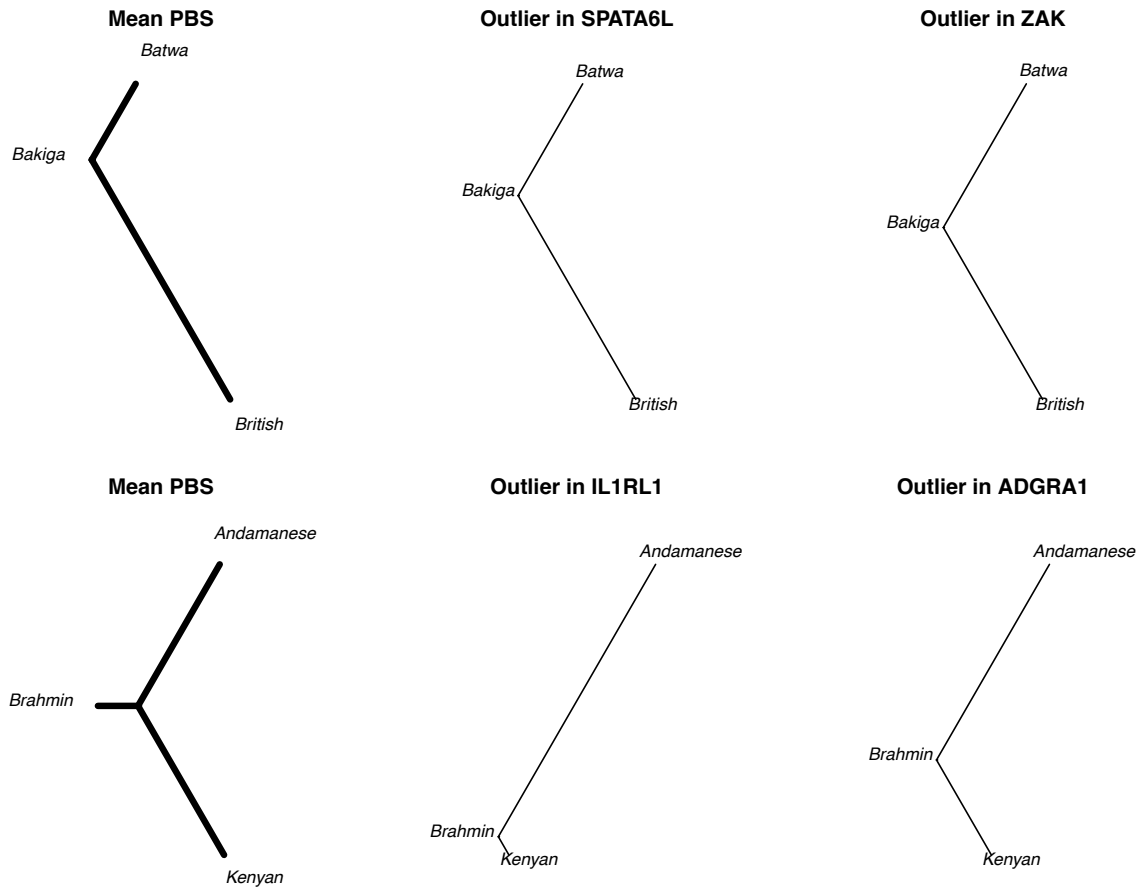

Figure S1: Mean values of the Population Branch Statistic (PBS; left) for the African dataset (Batwa, Bakiga, and outgroup British populations; upper row) and Asian dataset (Andamanese, Brahmin, and outgroup Kenyan populations; lower row). Middle and right columns contain PBS values for two outlier SNPs in each population.

Fig. S2: Population Branch Statistic (PBS) by SNP.

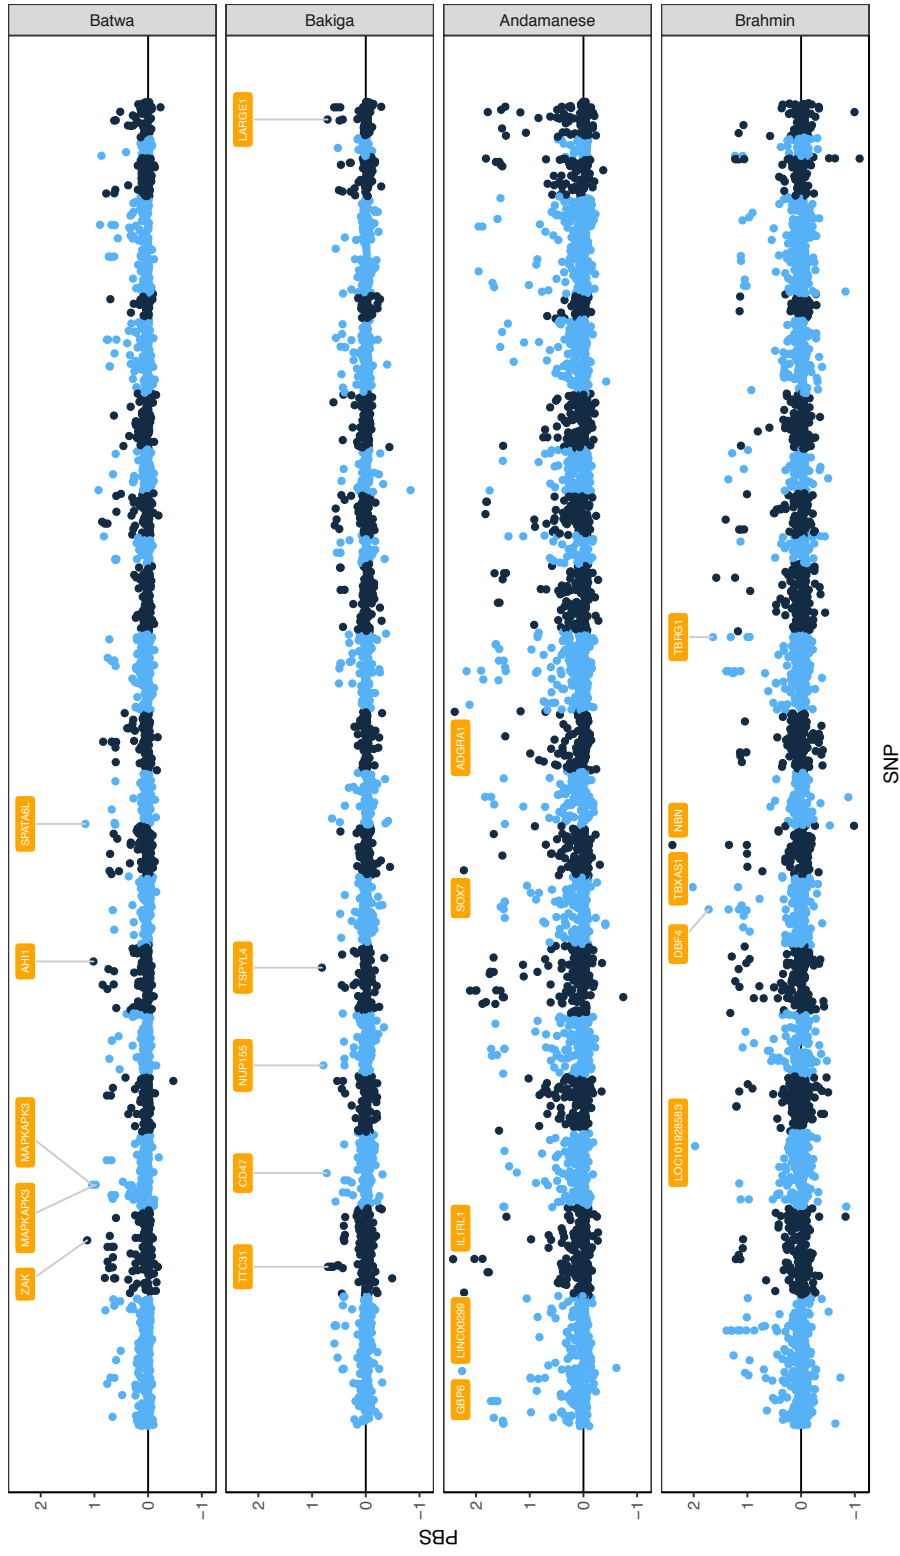

Figure S2: Population Branch Statistic (PBS) values plotted across the genome for the four focal populations. The genes containing the SNPs with the 5 highest PBS values in each population are labeled.



Fig. S3: Population Branch Statistic (PBS) by gene SNP count.

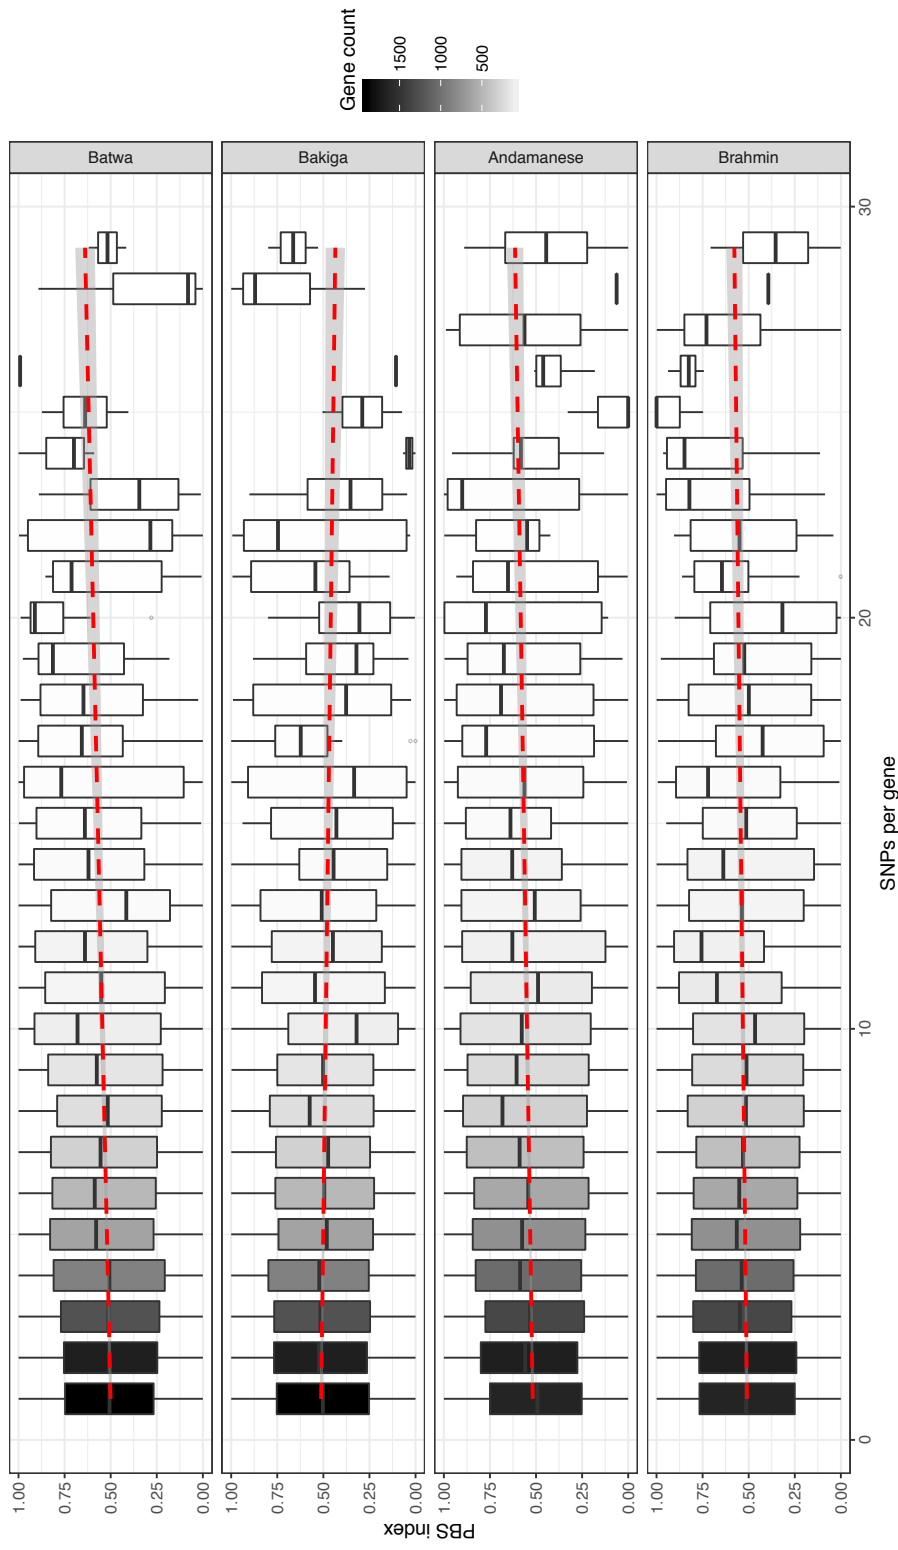

Figure S3: Population Branch Statistic (PBS) selection index values plotted by number of SNPs in gene. Color indicates number of genes with that SNP count. Only SNP counts from 1 to 30 shown.

Fig. S4: Gene size- and MAF-based corrections' impact on p-value.

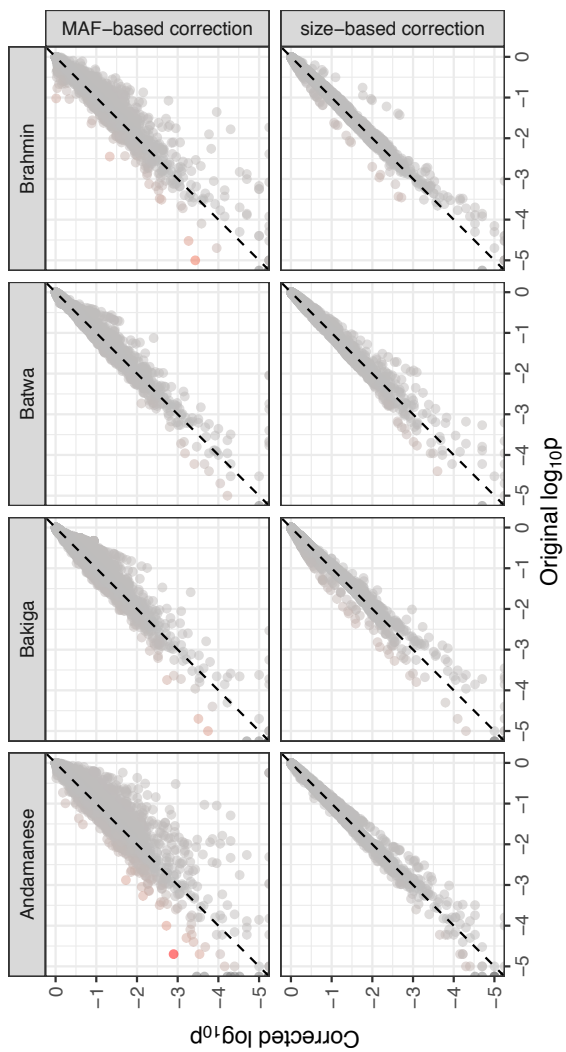

Figure S4: Plots of PBS selection index values for genes corrected for gene size and MAF shown compared to the original uncorrected values (with both plotted on a logarithmic scale). Red shading indicates higher percent difference from original value.

Fig. S5: Gene size-corrected strong positive selection enrichment results.

A. Rainforest hunter-gatherers

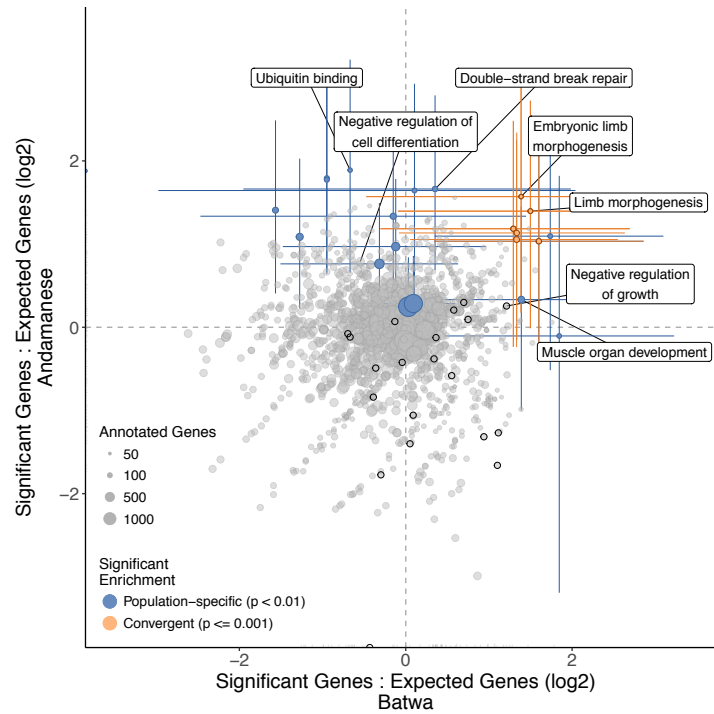

B. Agriculturalists

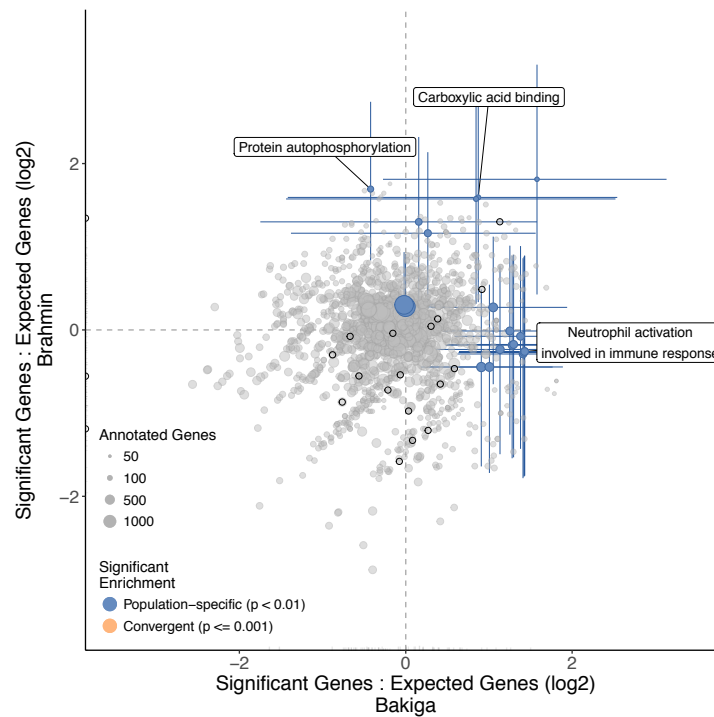

Figure S5: (Continued on the following page.)

Figure S5: After gene size-based correction, Gene Ontology (GO) functional categories' ratios of expected to observed counts of outlier genes (with PBS selection index  $< 0.01$ ) in the Batwa and Andamanese rainforest hunter-gatherers (A) and Bakiga and Brahmin agriculturalist control (B). Results shown for GO biological processes and molecular functions. Point size is scaled to number of annotated genes in category. Terms that are significantly overrepresented for genes under positive selection (Fisher  $p < 0.01$ ) in either population shown in blue and for both populations convergently (empirical permutation-based  $p < 0.005$ ) shown in orange. Colored lines represent 95% CI for significant categories estimated by bootstrapping genes within pathways. Dark outlines indicate growth-associated terms: the 'growth' biological process (GO:0040007) and its descendant terms, or the molecular functions 'growth factor binding,' 'growth factor receptor binding,' 'growth hormone receptor activity,' and 'growth factor activity' and their sub-categories.

Fig. S6: MAF-corrected strong positive selection enrichment results.

A. Rainforest hunter-gatherers

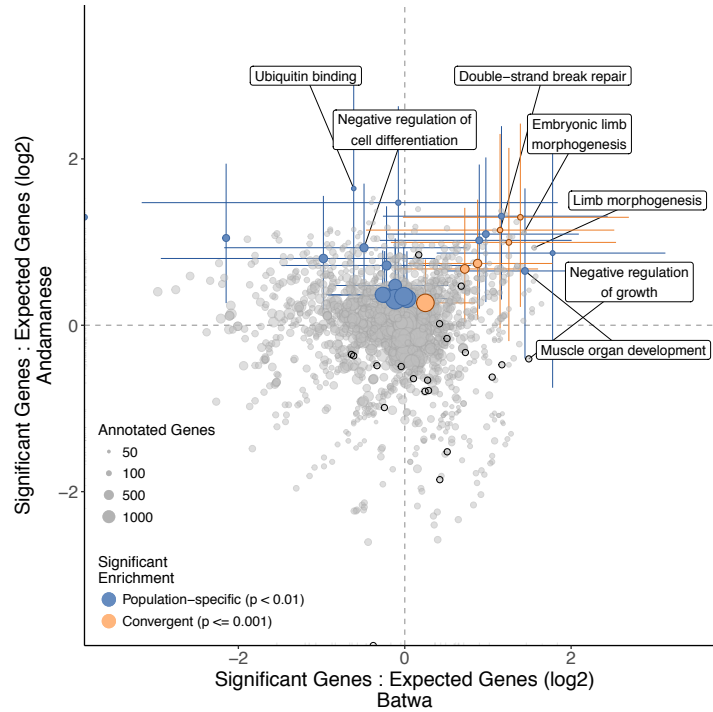

B. Agriculturalists

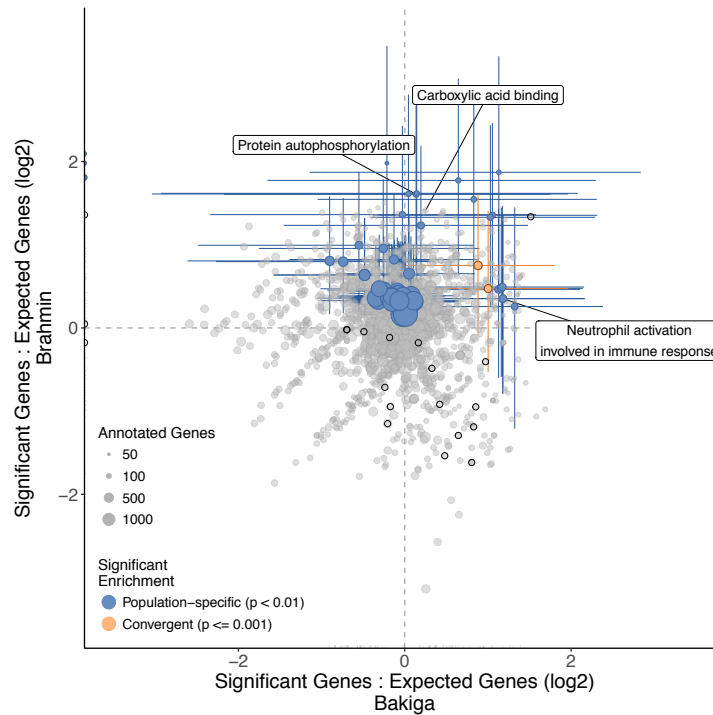

Figure S6: (Continued on the following page.)

Figure S6: After MAF-based correction, Gene Ontology (GO) functional categories' ratios of expected to observed counts of outlier genes (with PBS selection index  $< 0.01$ ) in the Batwa and Andamanese rainforest hunter-gatherers (A) and Bakiga and Brahmin agriculturalist control (B). Results shown for GO biological processes and molecular functions. Point size is scaled to number of annotated genes in category. Terms that are significantly overrepresented for genes under positive selection (Fisher  $p < 0.01$ ) in either population shown in blue and for both populations convergently (empirical permutation-based  $p < 0.005$ ) shown in orange. Colored lines represent 95% CI for significant categories estimated by bootstrapping genes within pathways. Dark outlines indicate growth-associated terms: the 'growth' biological process (GO:0040007) and its descendant terms, or the molecular functions 'growth factor binding,' 'growth factor receptor binding,' 'growth hormone receptor activity,' and 'growth factor activity' and their sub-categories.

Fig. S7: Gene size-corrected polygenic distribution shift test results.

A. Rainforest hunter-gatherers

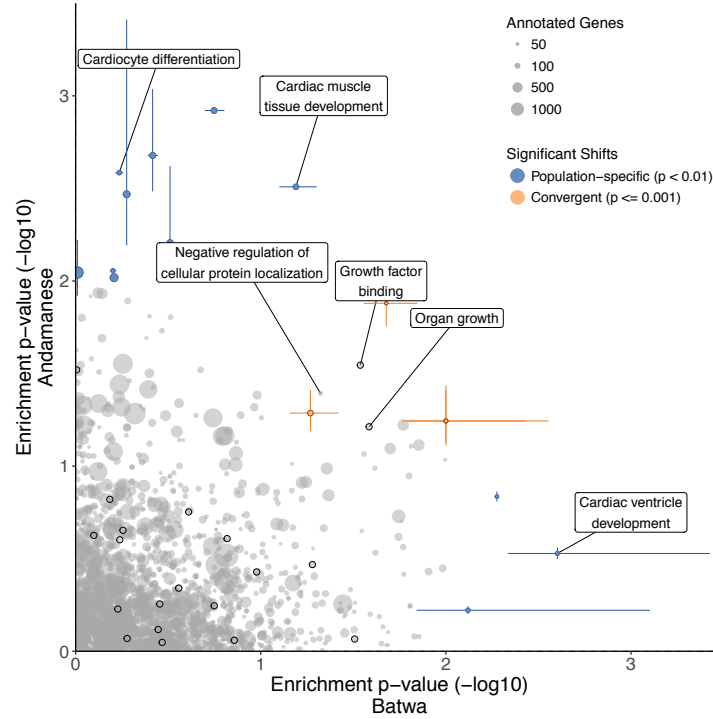

B. Agriculturalists

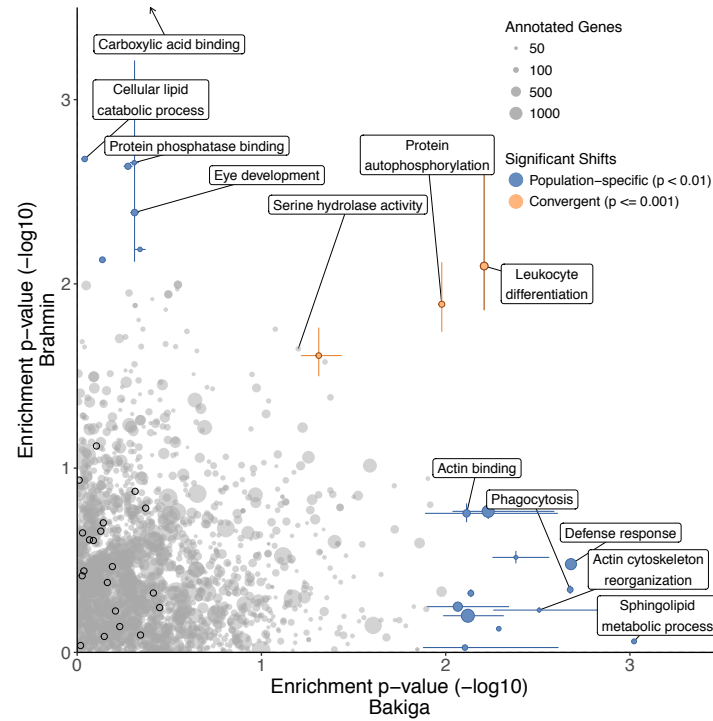

Figure S7: (Continued on the following page.)

Figure S7: After gene size-based correction, Gene Ontology (GO) functional categories' distribution shift test p-values, indicating a shift in the PBS selection index values for genes, in the Batwa and Andamanese rainforest hunter-gatherers (A) and Bakiga and Brahmin agriculturalist control (B). Results shown for GO biological processes and molecular functions. Point size is scaled to number of annotated genes in category. Terms that are significantly enriched for genes under positive selection (Kolmogorov-Smirnov  $p < 0.01$ ) in either population shown in blue and for both populations convergently (empirical permutation-based  $p < 0.005$ ) shown in orange. Colored lines represent 95% CI for significant categories estimated by bootstrapping genes within pathways. Dark outlines indicate growth-associated terms: the 'growth' biological process (GO:0040007) and its descendant terms, or the molecular functions 'growth factor binding,' 'growth factor receptor binding,' 'growth hormone receptor activity,' and 'growth factor activity' and their sub-categories. One GO molecular function, "carboxylic acid binding" (GO:0031406; Brahmin  $p = 7.3 \times 10^{-5}$ ;  $q = 0.0157$ ) not shown.



Fig. S8: Gene size-corrected polygenic distribution shift test results.

A. Rainforest hunter-gatherers

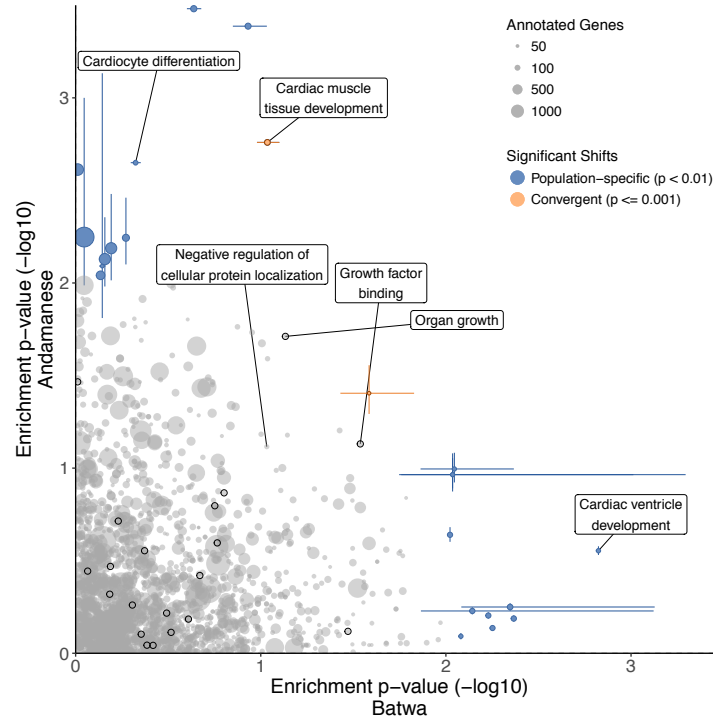

B. Agriculturalists

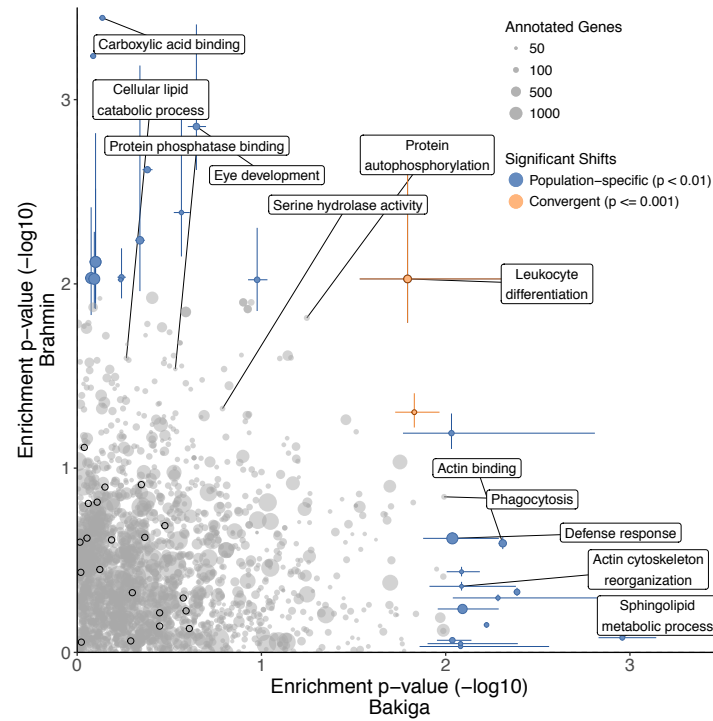

Figure S8: (Continued on the following page.)

Figure S8: After MAF-based correction, Gene Ontology (GO) functional categories' distribution shift test p-values, indicating a shift in the PBS selection index values for genes, in the Batwa and Andamanese rainforest hunter-gatherers (A) and Bakiga and Brahmin agriculturalist control (B). Results shown for GO biological processes and molecular functions. Point size is scaled to number of annotated genes in category. Terms that are significantly enriched for genes under positive selection (Kolmogorov-Smirnov  $p < 0.01$ ) in either population shown in blue and for both populations convergently (empirical permutation-based  $p < 0.005$ ) shown in orange. Colored lines represent 95% CI for significant categories estimated by bootstrapping genes within pathways. Dark outlines indicate growth-associated terms: the 'growth' biological process (GO:0040007) and its descendant terms, or the molecular functions 'growth factor binding,' 'growth factor receptor binding,' 'growth hormone receptor activity,' and 'growth factor activity' and their sub-categories.

### 3 Tables

177

Table S1: Gene Ontology (GO) biological processes with evidence of convergent enrichment for strong positive selection in the hunter-gatherer populations, as measured by outlier Population Branch Statistic (PBS) values. No molecular functions were found to be convergently enriched. Joint  $p$ -values were computed via a permutation-based method, and those with joint empirical  $p < 0.005$  are shown.

| GO Biological Process                        | Joint $p$ | <i>Batwa:</i> |      |        | <i>Andamanese:</i> |      |      |        |          |
|----------------------------------------------|-----------|---------------|------|--------|--------------------|------|------|--------|----------|
|                                              |           | Exp.          | Obs. | $p$    | adj. $p$           | Exp. | Obs. | $p$    | adj. $p$ |
| GO:0030326 embryonic limb morphogenesis      | 0.000     | 1.47          | 4    | 0.0584 | 1                  | 2.01 | 6    | 0.0147 | 0.901    |
| GO:0035107 appendage morphogenesis           | 0.000     | 1.69          | 5    | 0.0267 | 1                  | 2.27 | 6    | 0.0254 | 0.901    |
| GO:0035108 limb morphogenesis                | 0.000     | 1.69          | 5    | 0.0267 | 1                  | 2.27 | 6    | 0.0254 | 0.901    |
| GO:0035113 embryonic appendage morphogenesis | 0.000     | 1.47          | 4    | 0.0584 | 1                  | 2.01 | 6    | 0.0147 | 0.901    |
| GO:0048736 appendage development             | 0.001     | 1.95          | 5    | 0.0448 | 1                  | 2.62 | 6    | 0.047  | 1.000    |
| GO:0060173 limb development                  | 0.001     | 1.95          | 5    | 0.0448 | 1                  | 2.62 | 6    | 0.047  | 1.000    |
| GO:0030048 actin filament-based movement     | 0.002     | 1.72          | 4    | 0.0927 | 1                  | 2.33 | 5    | 0.0834 | 1.000    |
| GO:0048705 skeletal system morphogenesis     | 0.002     | 2.20          | 5    | 0.0688 | 1                  | 2.95 | 6    | 0.0743 | 1.000    |
| GO:0007034 vacuolar transport                | 0.003     | 1.37          | 4    | 0.0470 | 1                  | 1.75 | 4    | 0.0968 | 1.000    |

Table S2: Gene Ontology (GO) biological processes with evidence of population-specific enrichment for strong positive selection in the hunter-gatherer populations, as measured by outlier Population Branch Statistic (PBS) values. Results with  $p < 0.01$  shown.

| GO                                                     | Exp. | Obs.  | $p$    | adj. $p$ |
|--------------------------------------------------------|------|-------|--------|----------|
| <i>Batwa RHG - Biological Processes:</i>               |      |       |        |          |
| GO:0007517 muscle organ development                    | 10   | 4.02  | 0.0069 | 0.708    |
| GO:0045926 negative regulation of growth               | 7    | 2.48  | 0.0118 | 0.708    |
| <i>Andamanese RHG - Biological Processes:</i>          |      |       |        |          |
| GO:0006302 double-strand break repair                  | 10   | 3.14  | 0.0011 | 0.171    |
| GO:0070085 glycosylation                               | 12   | 4.34  | 0.0013 | 0.171    |
| GO:0000723 telomere maintenance                        | 8    | 2.30  | 0.0020 | 0.175    |
| GO:0033365 protein localization to organelle           | 25   | 14.09 | 0.0036 | 0.189    |
| GO:1903827 regulation of cellular protein localization | 19   | 9.66  | 0.0036 | 0.189    |
| GO:0007569 cell aging                                  | 6    | 1.62  | 0.0052 | 0.208    |
| GO:0009101 glycoprotein biosynthetic process           | 12   | 5.28  | 0.0065 | 0.208    |
| GO:0034613 cellular protein localization               | 41   | 27.87 | 0.0067 | 0.208    |
| GO:0051179 localization                                | 116  | 97.30 | 0.0079 | 0.208    |
| GO:0060249 anatomical structure homeostasis            | 13   | 6.09  | 0.0079 | 0.208    |
| GO:0045596 negative regulation of cell differentiation | 18   | 9.79  | 0.0090 | 0.215    |
| <i>Batwa RHG - Molecular Functions:</i>                |      |       |        |          |
| GO:0003723 RNA binding                                 | 26   | 17.66 | 0.028  | 0.732    |
| GO:0043167 ion binding                                 | 83   | 70.68 | 0.034  | 0.732    |
| <i>Andamanese RHG - Molecular Functions:</i>           |      |       |        |          |
| GO:0043130 ubiquitin binding                           | 7    | 1.89  | 0.0026 | 0.177    |
| GO:0008233 peptidase activity                          | 17   | 9.58  | 0.0153 | 0.383    |

Table S3: Gene Ontology (GO) biological processes (BP) and molecular functions (MF) with evidence of convergent distribution shifts in PBS selection index values in the hunter-gatherer populations. Joint  $p$ -values were computed via a permutation-based method, and those with joint empirical  $p < 0.005$  are shown.

| GO |            |                                                      | Joint $p$ | <i>Batwa:</i> |          | <i>Andamanese:</i> |          |
|----|------------|------------------------------------------------------|-----------|---------------|----------|--------------------|----------|
|    |            |                                                      |           | $p$           | adj. $p$ | $p$                | adj. $p$ |
| BP | GO:0035265 | organ growth                                         | 0.001     | 0.0275        | 0.997    | 0.04509            | 1.000    |
|    | GO:0048738 | cardiac muscle tissue development                    | 0.001     | 0.0461        | 0.997    | 0.00265            | 1.000    |
|    | GO:1903828 | negative regulation of cellular protein localization | 0.001     | 0.0360        | 0.997    | 0.04275            | 1.000    |
|    | GO:0016202 | regulation of striated muscle tissue development     | 0.002     | 0.0135        | 0.997    | 0.04406            | 1.000    |
|    | GO:1901861 | regulation of muscle tissue development              | 0.002     | 0.0135        | 0.997    | 0.04406            | 1.000    |
|    | GO:0045444 | fat cell differentiation                             | 0.004     | 0.0573        | 0.997    | 0.04058            | 1.000    |
| MF | GO:0019199 | transmembrane receptor protein kinase activity       | 0.000     | 0.027         | 0.817    | 0.0261             | 0.784    |
|    | GO:0019838 | growth factor binding                                | 0.000     | 0.021         | 0.817    | 0.0269             | 0.784    |
|    | GO:0032559 | adenyl ribonucleotide binding                        | 0.003     | 0.020         | 0.817    | 0.0579             | 0.877    |
|    | GO:0030554 | adenyl nucleotide binding                            | 0.004     | 0.017         | 0.817    | 0.0755             | 0.877    |

Table S4: Gene Ontology (GO) biological processes (BP) and molecular functions (MF) with evidence of population-specific distribution shifts in PBS selection index values in the hunter-gatherer populations. No molecular functions were found to be significantly shifted for the Batwa. Results with  $p < 0.01$  are shown.

| GO                                                                      | $p$   | adj. $p$ |
|-------------------------------------------------------------------------|-------|----------|
| <i>Batwa RHG - Biological Processes:</i>                                |       |          |
| GO:0003231 cardiac ventricle development                                | 0.001 | 0.302    |
| GO:0061351 neural precursor cell proliferation                          | 0.007 | 0.348    |
| GO:0034976 response to endoplasmic reticulum stress                     | 0.009 | 0.348    |
| <i>Andamanese RHG - Biological Processes:</i>                           |       |          |
| GO:0016579 protein deubiquitination                                     | 0.001 | 0.232    |
| GO:0035051 cardiocyte differentiation                                   | 0.002 | 0.232    |
| GO:0048738 cardiac muscle tissue development                            | 0.003 | 0.232    |
| GO:1901800 positive regulation of proteasomal protein catabolic process | 0.004 | 0.262    |
| GO:0006508 proteolysis                                                  | 0.009 | 0.453    |
| <i>Andamanese RHG - Molecular Functions:</i>                            |       |          |
| GO:0005085 guanyl-nucleotide exchange factor activity                   | 0.005 | 0.278    |

Table S5: After gene size-based correction, Gene Ontology (GO) biological processes and molecular functions with evidence of convergent enrichment for strong positive selection in the hunter-gatherer populations, as measured by outlier Population Branch Statistic (PBS) values. Joint  $p$ -values were computed via a permutation-based method, and those with joint empirical  $p < 0.005$  are shown.

| GO Biological Process                                       | Joint $p$ | Batwa: |      |        | Andamanese: |      |     |        |       |     |
|-------------------------------------------------------------|-----------|--------|------|--------|-------------|------|-----|--------|-------|-----|
|                                                             |           | Exp.   | Obs. | $p$    | Exp.        | Obs. | $p$ |        |       |     |
| GO:0035107 appendage morphogenesis                          | 0.000     | 1.77   | 5    | 0.0315 | 1           | 2.28 | 6   | 0.0258 | 0.966 |     |
| GO:0035108 limb morphogenesis                               | 0.000     | 1.77   | 5    | 0.0315 | 1           | 2.28 | 6   | 0.0258 | 0.966 |     |
| GO:0048736 appendage development                            | 0.000     | 2.04   | 5    | 0.0524 | 1           | 2.64 | 6   | 0.0478 | 1.000 |     |
| GO:0060173 limb development                                 | 0.000     | 2.04   | 5    | 0.0524 | 1           | 2.64 | 6   | 0.0478 | 1.000 |     |
| GO:1901617 organic hydroxy compound biosynthetic process    | 0.000     | 2.38   | 6    | 0.0314 | 1           | 3.19 | 7   | 0.0401 | 0.980 |     |
| GO:0030326 embryonic limb morphogenesis                     | 0.001     | 1.53   | 4    | 0.0665 | 1           | 2.02 | 6   | 0.0150 | 0.966 |     |
| GO:0035113 embryonic appendage morphogenesis                | 0.001     | 1.53   | 4    | 0.0665 | 1           | 2.02 | 6   | 0.0150 | 0.966 |     |
| GO:0030048 actin filament-based movement                    | 0.002     | 1.80   | 6    | 0.0089 | 1           | 2.34 | 5   | 0.0845 | 1.000 |     |
| GO:0007034 vacuolar transport                               | 0.004     | 1.43   | 4    | 0.0537 | 1           | 1.76 | 4   | 0.0979 | 1.000 |     |
|                                                             |           | Batwa: |      |        | Andamanese: |      |     |        |       |     |
| GO Molecular Function                                       | Joint $p$ | Exp.   | Obs. | $p$    | Exp.        | Obs. | $p$ | Exp.   | Obs.  | $p$ |
| GO:0008514 organic anion transmembrane transporter activity | 0.000     | 2.78   | 7    | 0.0212 | 0.6853      | 3.37 | 7   | 0.0515 | 0.902 |     |
| GO:0015081 sodium ion transmembrane transporter activity    | 0.000     | 2.31   | 7    | 0.0081 | 0.6853      | 2.93 | 6   | 0.0726 | 0.902 |     |

Table S6: After MAF-based correction, Gene Ontology (GO) biological processes and molecular functions with evidence of convergent enrichment for strong positive selection in the hunter-gatherer populations, as measured by outlier Population Branch Statistic (PBS) values. Joint  $p$ -values were computed via a permutation-based method, and those with joint empirical  $p < 0.005$  are shown.

| GO Biological Process                                                      | Batwa: |      |        |          | Andamanese: |      |         |          |
|----------------------------------------------------------------------------|--------|------|--------|----------|-------------|------|---------|----------|
|                                                                            | Exp.   | Obs. | $p$    | adj. $p$ | Exp.        | Obs. | $p$     | adj. $p$ |
| GO:0048522 positive regulation of cellular process                         | 55.57  | 66   | 0.0534 | 1        | 87.93       | 106  | 0.01153 | 0.946    |
| GO:1901617 organic hydroxy compound biosynthetic process                   | 2.29   | 6    | 0.0267 | 1        | 3.66        | 9    | 0.01069 | 0.946    |
| GO:0006302 double-strand break repair                                      | 2.26   | 5    | 0.0757 | 1        | 3.62        | 8    | 0.02808 | 0.946    |
| GO:0006897 endocytosis                                                     | 8.49   | 14   | 0.0447 | 1        | 13.76       | 22   | 0.01948 | 0.946    |
| GO:0048738 cardiac muscle tissue development                               | 2.52   | 6    | 0.0399 | 1        | 4.01        | 8    | 0.04694 | 0.946    |
| GO:0080135 regulation of cellular response to stress                       | 7.63   | 14   | 0.0203 | 1        | 11.95       | 20   | 0.01624 | 0.946    |
| GO:0014706 striated muscle tissue development                              | 4.07   | 8    | 0.0509 | 1        | 6.55        | 14   | 0.00585 | 0.946    |
| GO:0070302 regulation of stress-activated protein kinase signaling cascade | 2.52   | 6    | 0.0399 | 1        | 3.93        | 7    | 0.09815 | 0.946    |
| GO:1901615 organic hydroxy compound metabolic process                      | 5.70   | 9    | 0.1168 | 1        | 8.87        | 14   | 0.06046 | 0.946    |
| GO:2001020 regulation of response to DNA damage stimulus                   | 2.09   | 5    | 0.0572 | 1        | 3.35        | 7    | 0.04997 | 0.946    |
| GO:0051592 response to calcium ion                                         | 1.75   | 6    | 0.0079 | 1        | 2.74        | 5    | 0.13789 | 0.946    |
| GO:0015718 monocarboxylic acid transport                                   | 1.63   | 4    | 0.0793 | 1        | 2.39        | 5    | 0.08980 | 0.946    |
| GO:0030048 actin filament-based movement                                   | 1.73   | 4    | 0.0942 | 1        | 2.78        | 7    | 0.02039 | 0.946    |
| GO:0030326 embryonic limb morphogenesis                                    | 1.48   | 4    | 0.0594 | 1        | 2.31        | 5    | 0.08052 | 0.946    |
| GO:0031098 stress-activated protein kinase signaling                       | 3.15   | 7    | 0.0383 | 1        | 4.97        | 8    | 0.12454 | 0.946    |
| GO:0035113 embryonic appendage morphogenesis                               | 1.48   | 4    | 0.0594 | 1        | 2.31        | 5    | 0.08052 | 0.946    |
| GO:0060537 muscle tissue development                                       | 4.30   | 8    | 0.0660 | 1        | 6.90        | 14   | 0.00910 | 0.946    |
| GO Molecular Function                                                      | Batwa: |      |        |          | Andamanese: |      |         |          |
|                                                                            | Exp.   | Obs. | $p$    | adj. $p$ | Exp.        | Obs. | $p$     | adj. $p$ |
| GO:0008514 organic anion transmembrane transporter activity                | 2.68   | 6    | 0.051  | 0.798    | 4.03        | 10   | 0.0068  | 0.959    |
| GO:0005342 organic acid transmembrane transporter activity                 | 1.97   | 5    | 0.046  | 0.798    | 2.96        | 7    | 0.0282  | 1.000    |
| GO:0015081 sodium ion transmembrane transporter activity                   | 2.22   | 5    | 0.071  | 0.821    | 3.50        | 7    | 0.0600  | 1.000    |
| GO:0046943 carboxylic acid transmembrane transporter activity              | 1.79   | 4    | 0.103  | 0.964    | 2.70        | 7    | 0.0177  | 1.000    |



Table S7: After gene size-based correction, Gene Ontology (GO) biological processes with evidence of population-specific enrichment for strong positive selection in the hunter-gatherer populations, as measured by outlier Population Branch Statistic (PBS) values. Results with  $p < 0.01$  shown.

| GO                                                       | Exp. | Obs.  | $p$    | adj. $p$ |
|----------------------------------------------------------|------|-------|--------|----------|
| <i>Batwa RHG - Biological Processes:</i>                 |      |       |        |          |
| GO:0007517 muscle organ development                      | 11   | 4.20  | 0.0032 | 0.5650   |
| GO:1903825 organic acid transmembrane transport          | 6    | 1.67  | 0.0061 | 0.5652   |
| GO:0030048 actin filament-based movement                 | 6    | 1.80  | 0.0061 | 0.5652   |
| <i>Andamanese RHG - Biological Processes:</i>            |      |       |        |          |
| GO:0006302 double-strand break repair                    | 10   | 3.16  | 0.0012 | 0.231    |
| GO:0000723 telomere maintenance                          | 8    | 2.31  | 0.0020 | 0.231    |
| GO:1903827 regulation of cellular protein localization   | 19   | 9.70  | 0.0038 | 0.231    |
| GO:0070085 glycosylation                                 | 11   | 4.36  | 0.0042 | 0.231    |
| GO:1900180 regulation of protein localization to nucleus | 10   | 3.77  | 0.0044 | 0.231    |
| GO:0007569 cell aging                                    | 6    | 1.63  | 0.0053 | 0.232    |
| GO:0060249 anatomical structure homeostasis              | 13   | 6.12  | 0.0082 | 0.299    |
| GO:0051234 establishment of localization                 | 99   | 81.24 | 0.0091 | 0.299    |
| <i>Batwa RHG - Molecular Functions:</i>                  |      |       |        |          |
| GO:0015081 sodium ion transmembrane transporter activity | 7    | 2.31  | 0.0081 | 0.33245  |
| <i>Andamanese RHG - Molecular Functions:</i>             |      |       |        |          |
| GO:0043130 ubiquitin binding                             | 7    | 1.89  | 0.0026 | 0.177    |

Table S8: After MAF-based correction, Gene Ontology (GO) biological processes with evidence of population-specific enrichment for strong positive selection in the hunter-gatherer populations, as measured by outlier Population Branch Statistic (PBS) values. No molecular functions were found to be significantly shifted for the Batwa. Results with  $p < 0.01$  shown.

| GO                                                                    | Exp. | Obs.   | $p$     | adj. $p$ |
|-----------------------------------------------------------------------|------|--------|---------|----------|
| <i>Batwa RHG - Biological Processes:</i>                              |      |        |         |          |
| GO:0007517 muscle organ development                                   | 11   | 4.04   | 0.0023  | 0.492    |
| GO:0051592 response to calcium ion                                    | 6    | 1.75   | 0.0079  | 0.492    |
| <i>Andamanese RHG - Biological Processes:</i>                         |      |        |         |          |
| GO:0051179 localization                                               | 142  | 114.34 | 0.00044 | 0.115    |
| GO:0045596 negative regulation of cell differentiation                | 22   | 11.53  | 0.0026  | 0.266    |
| GO:0071229 cellular response to acid chemical                         | 9    | 3.24   | 0.0048  | 0.266    |
| GO:0002460 adaptive immune response based on somatic recombination... | 11   | 4.47   | 0.0050  | 0.266    |
| GO:0014706 striated muscle tissue development                         | 14   | 6.55   | 0.0059  | 0.266    |
| GO:0048584 positive regulation of response to stimulus                | 53   | 38.05  | 0.0067  | 0.266    |
| GO:0016337 single organismal cell-cell adhesion                       | 22   | 12.61  | 0.0076  | 0.266    |
| <i>Andamanese RHG - Molecular Functions:</i>                          |      |        |         |          |
| GO:0043130 ubiquitin binding                                          | 7    | 2.24   | 0.0067  | 0.221    |
| GO:0008514 organic anion transmembrane transporter activity           | 10   | 4.03   | 0.0068  | 0.221    |

Table S9: After gene size-based correction, Gene Ontology (GO) biological processes (BP) and molecular functions (MF) with evidence of convergent distribution shifts in PBS selection index values in the hunter-gatherer populations. Joint  $p$ -values were computed via a permutation-based method, and those with joint empirical  $p < 0.005$  are shown.

| GO |            |                                                      | Joint $p$ | <i>Batwa:</i> |          | <i>Andamanese:</i> |          |
|----|------------|------------------------------------------------------|-----------|---------------|----------|--------------------|----------|
|    |            |                                                      |           | $p$           | adj. $p$ | $p$                | adj. $p$ |
| BP | GO:0016202 | regulation of striated muscle tissue development     | 0.000     | 0.0100        | 0.994    | 0.0570             | 1.000    |
|    | GO:1901861 | regulation of muscle tissue development              | 0.000     | 0.0100        | 0.994    | 0.0570             | 1.000    |
|    | GO:0045444 | fat cell differentiation                             | 0.001     | 0.0539        | 0.994    | 0.0517             | 1.000    |
|    | GO:0048634 | regulation of muscle organ development               | 0.002     | 0.0101        | 0.994    | 0.0924             | 1.000    |
|    | GO:0035265 | organ growth                                         | 0.003     | 0.0260        | 0.994    | 0.0613             | 1.000    |
|    | GO:0048738 | cardiac muscle tissue development                    | 0.003     | 0.0646        | 0.994    | 0.0031             | 1.000    |
|    | GO:0051147 | regulation of muscle cell differentiation            | 0.003     | 0.0242        | 0.994    | 0.1026             | 1.000    |
|    | GO:1903828 | negative regulation of cellular protein localization | 0.003     | 0.0475        | 0.994    | 0.0405             | 1.000    |
|    | GO:0046434 | organophosphate catabolic process                    | 0.004     | 0.0154        | 0.994    | 0.0780             | 1.000    |
| MF | GO:0019199 | transmembrane receptor protein kinase activity       | 0.000     | 0.021         | 0.698    | 0.0132             | 0.736    |
|    | GO:0019838 | growth factor binding                                | 0.002     | 0.029         | 0.750    | 0.0285             | 0.736    |
|    | GO:0030554 | adenyl nucleotide binding                            | 0.002     | 0.014         | 0.698    | 0.0769             | 0.877    |
|    | GO:0032559 | adenyl ribonucleotide binding                        | 0.002     | 0.017         | 0.698    | 0.0599             | 0.877    |

Table S10: After MAF-based correction, Gene Ontology (GO) biological processes (BP) and molecular functions (MF) with evidence of convergent distribution shifts in PBS selection index values in the hunter-gatherer populations. Joint  $p$ -values were computed via a permutation-based method, and those with joint empirical  $p < 0.005$  are shown.

| GO |            |                                                | Joint $p$ | <i>Batwa:</i> |          | <i>Andamanese:</i> |          |
|----|------------|------------------------------------------------|-----------|---------------|----------|--------------------|----------|
|    |            |                                                |           | $p$           | adj. $p$ | $p$                | adj. $p$ |
| BP | GO:0048738 | cardiac muscle tissue development              | 0.000     | 0.0921        | 0.993    | 0.00174            | 0.878    |
|    | GO:0033002 | muscle cell proliferation                      | 0.002     | 0.0919        | 0.993    | 0.02565            | 1.000    |
|    | GO:0035265 | organ growth                                   | 0.003     | 0.0736        | 0.993    | 0.01943            | 1.000    |
|    | GO:0003007 | heart morphogenesis                            | 0.004     | 0.0375        | 0.993    | 0.06262            | 1.000    |
|    | GO:0016579 | protein deubiquitination                       | 0.004     | 0.1171        | 0.993    | 0.00041            | 0.369    |
| MF | GO:0019199 | transmembrane receptor protein kinase activity | 0.001     | 0.026         | 0.675    | 0.039              | 0.874    |

Table S11: After gene size-based correction, Gene Ontology (GO) biological processes (BP) and molecular functions (MF) with evidence of population-specific distribution shifts in PBS selection index values in the hunter-gatherer populations. No molecular functions were found to be significantly shifted for the Batwa. Results with  $p < 0.01$  are shown.

| GO                                            |                                                              | $p$    | adj. $p$ |
|-----------------------------------------------|--------------------------------------------------------------|--------|----------|
| <i>Batwa RHG - Biological Processes:</i>      |                                                              |        |          |
| GO:0003231                                    | cardiac ventricle development                                | 0.0025 | 0.371    |
| GO:0061351                                    | neural precursor cell proliferation                          | 0.0080 | 0.371    |
| <i>Andamanese RHG - Biological Processes:</i> |                                                              |        |          |
| GO:0016579                                    | protein deubiquitination                                     | 0.001  | 0.273    |
| GO:0035051                                    | cardiocyte differentiation                                   | 0.003  | 0.273    |
| GO:0048738                                    | cardiac muscle tissue development                            | 0.003  | 0.273    |
| GO:1901800                                    | positive regulation of proteasomal protein catabolic process | 0.006  | 0.322    |
| GO:0001936                                    | regulation of endothelial cell proliferation                 | 0.006  | 0.322    |
| GO:0006508                                    | proteolysis                                                  | 0.009  | 0.396    |
| <i>Andamanese RHG - Molecular Functions:</i>  |                                                              |        |          |
| GO:0005085                                    | guanyl-nucleotide exchange factor activity                   | 0.0034 | 0.224    |
| GO:0008134                                    | transcription factor binding                                 | 0.0096 | 0.224    |

Table S12: After MAF-based correction, Gene Ontology (GO) biological processes (BP) and molecular functions (MF) with evidence of population-specific distribution shifts in PBS selection index values in the hunter-gatherer populations. No molecular functions were found to be significantly shifted for the Batwa. Results with  $p < 0.01$  are shown.

| GO                                            |                                                                  | $p$    | adj. $p$ |
|-----------------------------------------------|------------------------------------------------------------------|--------|----------|
| <i>Batwa RHG - Biological Processes:</i>      |                                                                  |        |          |
| GO:0003231                                    | cardiac ventricle development                                    | 0.0015 | 0.346    |
| GO:0034284                                    | response to monosaccharide                                       | 0.0043 | 0.346    |
| GO:0008217                                    | regulation of blood pressure                                     | 0.0056 | 0.346    |
| GO:0050864                                    | regulation of B cell activation                                  | 0.0083 | 0.346    |
| GO:0048634                                    | regulation of muscle organ development                           | 0.0090 | 0.346    |
| GO:1901861                                    | regulation of muscle tissue development                          | 0.0092 | 0.346    |
| <i>Andamanese RHG - Biological Processes:</i> |                                                                  |        |          |
| GO:0070646                                    | protein modification by small protein removal                    | 0.0003 | 0.087    |
| GO:0048738                                    | cardiac muscle tissue development                                | 0.0017 | 0.160    |
| GO:0035051                                    | cardiocyte differentiation                                       | 0.0022 | 0.160    |
| GO:0006508                                    | proteolysis                                                      | 0.0024 | 0.156    |
| GO:0071840                                    | cellular component organization or biogenesis                    | 0.0057 | 0.283    |
| GO:0007155                                    | cell adhesion                                                    | 0.0065 | 0.283    |
| GO:0007169                                    | transmembrane receptor protein tyrosine kinase signaling pathway | 0.0091 | 0.298    |
| <i>Andamanese RHG - Molecular Functions:</i>  |                                                                  |        |          |
| GO:0005085                                    | guanyl-nucleotide exchange factor activity                       | 0.0057 | 0.198    |
| GO:0019783                                    | ubiquitin-like protein-specific protease activity                | 0.0081 | 0.198    |

Table S13: Comparison of results of two methods for computing empirical test for convergence in strong outlier selection in both the Batwa and Andamanese RHGs. In the original method, genes and PBS selection index values are permuted to create an empirical null distribution. In the modified case, genes and their Gene Ontology (GO) annotations are instead permuted to create the null distribution. Biological processes (BP) with empirical test for convergence  $p < 0.005$  in either method shown. No molecular functions were found to be significantly convergently enriched in both RHG populations.

|            | GO Biological Process                     | Original convergence $p$ | Modified convergence $p$ |
|------------|-------------------------------------------|--------------------------|--------------------------|
| GO:0035107 | appendage morphogenesis                   | 0.000                    | 0.000                    |
| GO:0035108 | limb morphogenesis                        | 0.000                    | 0.000                    |
| GO:0030326 | embryonic limb morphogenesis              | 0.000                    | 0.002                    |
| GO:0035113 | embryonic appendage morphogenesis         | 0.000                    | 0.002                    |
| GO:0048736 | appendage development                     | 0.001                    | 0.003                    |
| GO:0060173 | limb development                          | 0.001                    | 0.003                    |
| GO:0048705 | skeletal system morphogenesis             | 0.002                    | 0.003                    |
| GO:0048522 | positive regulation of cellular process   | 0.006                    | 0.003                    |
| GO:0080135 | regulation of cellular response to stress | 0.018                    | 0.004                    |
| GO:0030048 | actin filament-based movement             | 0.002                    | 0.006                    |
| GO:0007034 | vacuolar transport                        | 0.003                    | -                        |

Table S14: Comparison of results of two methods for computing empirical test for convergence in PBS selection index shift in both the Batwa and Andamanese RHGs. In the original method, genes and PBS selection index values are permuted to create an empirical null distribution. In the modified case, genes and their Gene Ontology (GO) annotations are instead permuted to create the null distribution. Biological processes (BP) and molecular functions (MF) with empirical test for convergence  $p < 0.005$  in either method shown.

| GO Biological Process |                                                      | Original convergence $p$ | Modified convergence $p$ |
|-----------------------|------------------------------------------------------|--------------------------|--------------------------|
| GO:0016202            | regulation of striated muscle tissue development     | 0.002                    | 0.000                    |
| GO:1901861            | regulation of muscle tissue development              | 0.002                    | 0.000                    |
| GO:0048738            | cardiac muscle tissue development                    | 0.001                    | 0.001                    |
| GO:0048634            | regulation of muscle organ development               | 0.005                    | 0.001                    |
| GO:0045444            | fat cell differentiation                             | 0.004                    | 0.002                    |
| GO:0003007            | heart morphogenesis                                  | 0.006                    | 0.002                    |
| GO:0035265            | organ growth                                         | 0.001                    | 0.004                    |
| GO:0046434            | organophosphate catabolic process                    | 0.007                    | 0.004                    |
| GO:1903828            | negative regulation of cellular protein localization | 0.001                    | 0.006                    |
| GO Molecular Function |                                                      | Original convergence $p$ | Modified convergence $p$ |
| GO:0019838            | growth factor binding                                | 0.000                    | 0.001                    |
| GO:0019199            | transmembrane receptor protein kinase activity       | 0.000                    | 0.002                    |
| GO:0032559            | adenyl ribonucleotide binding                        | 0.003                    | 0.004                    |
| GO:0030554            | adenyl nucleotide binding                            | 0.004                    | 0.004                    |
| GO:0005524            | ATP binding                                          | 0.005                    | 0.004                    |



## 178 References

- 179 [1] Blake, J. A. *et al.* Mouse Genome Database (MGD)-2017: Community knowledge re-  
180 source for the laboratory mouse. *Nucleic Acids Research* **45**, D723–D729 (2017).
- 181 [2] Wood, A. R. *et al.* Defining the role of common variation in the genomic and biological  
182 architecture of adult human height. *Nature Genetics* **46**, 1173–1186 (2014).
- 183 [3] Lui, J. C. *et al.* Synthesizing genome-wide association studies and expression microarray  
184 reveals novel genes that act in the human growth plate to modulate height. *Human*  
185 *Molecular Genetics* **21**, 5193–5201 (2012).
- 186 [4] Perry, G. H. *et al.* Adaptive, convergent origins of the pygmy phenotype in African rain-  
187 forest hunter-gatherers. *Proceedings of the National Academy of Sciences* **111**, E3596–  
188 E3603 (2014).
- 189 [5] Brown, K. R. & Jurisica, I. Online predicted human interaction database. *Bioinformatics*  
190 **21**, 2076–2082 (2005).
